# Supplementary material for: Metagenomic Sequencing Identified Specific Bacteriophage Signature Discriminating between Healthy and Diarrheal Neonatal Piglets
Source: Nutrients. 2023 Mar 27;15(7):1616. doi: 10.3390/nu15071616 (PMC10097093; doi:10.3390/nu15071616)
Supplement: Supplementary file 1 [file nutrients-15-01616-s001.zip]

Archive with 11 entries (8 files):
- Supplementary file/
- Supplementary file/Supplementary figures.pdf
- Supplementary file/Table S1.xlsx
- Supplementary file/Table S2.xlsx
- Supplementary file/Table S3.xlsx
- __MACOSX/
- __MACOSX/Supplementary file/
- __MACOSX/Supplementary file/._Supplementary figures.docx
- __MACOSX/Supplementary file/._Table S1.xlsx
- __MACOSX/Supplementary file/._Table S2.xlsx
- __MACOSX/Supplementary file/._Table S3.xlsx
