# Supplementary material for: Metagenomic Sequencing Identified Specific Bacteriophage Signature Discriminating between Healthy and Diarrheal Neonatal Piglets
Source: Nutrients. 2023 Mar 27;15(7):1616. doi: 10.3390/nu15071616 (PMC10097093; doi:10.3390/nu15071616)
Supplement: Supplementary file 1 [file nutrients-15-01616-s001.zip › Supplementary file/Table S1.xlsx]

## Sheet: Table S1
Table S1: novelty of identified viral genomes
contigID	Type
Diarrhea_10__12095	Reported
Diarrhea_10__13079	Reported
Diarrhea_10__1577	Reported
Diarrhea_10__1579	Reported
Diarrhea_10__16634	Reported
Diarrhea_10__17262	Reported
Diarrhea_10__17704	Reported
Diarrhea_10__19211	Reported
Diarrhea_10__20293	Reported
Diarrhea_10__22176	Reported
Diarrhea_10__23358	Reported
Diarrhea_10__26084	Reported
Diarrhea_10__29609	Reported
Diarrhea_10__30060	Reported
Diarrhea_10__30642	Reported
Diarrhea_10__30757	Reported
Diarrhea_10__32631	Reported
Diarrhea_10__34869	Reported
Diarrhea_10__36083	Reported
Diarrhea_10__39872	Reported
Diarrhea_10__44296	Reported
Diarrhea_10__45517	Reported
Diarrhea_10__7570	Reported
Diarrhea_11__104139	Reported
Diarrhea_11__104438	Reported
Diarrhea_11__108798	Reported
Diarrhea_11__109144	Reported
Diarrhea_11__12148	Reported
Diarrhea_11__14449	Reported
Diarrhea_11__17388	Reported
Diarrhea_11__18318	Reported
Diarrhea_11__22631	Reported
Diarrhea_11__23764	Reported
Diarrhea_11__29105	Reported
Diarrhea_11__31295	Reported
Diarrhea_11__32514	Reported
Diarrhea_11__43267	Reported
Diarrhea_11__53936	Reported
Diarrhea_11__56204	Reported
Diarrhea_11__57054	Reported
Diarrhea_11__5848	Reported
Diarrhea_11__60132	Reported
Diarrhea_11__63564	Reported
Diarrhea_11__6447	Reported
Diarrhea_11__65494	Reported
Diarrhea_11__65610	Reported
Diarrhea_11__7407	Reported
Diarrhea_11__74989	Reported
Diarrhea_11__78163	Reported
Diarrhea_11__81584	Reported
Diarrhea_11__86548	Reported
Diarrhea_11__89747	Reported
Diarrhea_11__9399	Reported
Diarrhea_11__95730	Reported
Diarrhea_11__96341	Reported
Diarrhea_11__9730	Reported
Diarrhea_11__97346	Reported
Diarrhea_11__9805	Reported
Diarrhea_12__102125	Reported
Diarrhea_12__103381	Reported
Diarrhea_12__18798	Reported
Diarrhea_12__25836	Reported
Diarrhea_12__30809	Reported
Diarrhea_12__39743	Reported
Diarrhea_12__41905	Reported
Diarrhea_12__46409	Reported
Diarrhea_12__47668	Reported
Diarrhea_12__48602	Reported
Diarrhea_12__48947	Reported
Diarrhea_12__50036	Reported
Diarrhea_12__53031	Reported
Diarrhea_12__54921	Reported
Diarrhea_12__6107	Reported
Diarrhea_12__63165	Reported
Diarrhea_12__66035	Reported
Diarrhea_12__67505	Reported
Diarrhea_12__6777	Reported
Diarrhea_12__70640	Reported
Diarrhea_12__71134	Reported
Diarrhea_12__75381	Reported
Diarrhea_12__75901	Reported
Diarrhea_12__76037	Reported
Diarrhea_12__76179	Reported
Diarrhea_12__79730	Reported
Diarrhea_12__8372	Reported
Diarrhea_12__86336	Reported
Diarrhea_12__88165	Reported
Diarrhea_12__93539	Reported
Diarrhea_12__95329	Reported
Diarrhea_12__97685	Reported
Diarrhea_13__1243	Reported
Diarrhea_13__12921	Reported
Diarrhea_13__18138	Reported
Diarrhea_13__25248	Reported
Diarrhea_13__28977	Reported
Diarrhea_13__29088	Reported
Diarrhea_13__29518	Reported
Diarrhea_13__32930	Reported
Diarrhea_13__33422	Reported
Diarrhea_13__3569	Reported
Diarrhea_13__37440	Reported
Diarrhea_13__40100	Reported
Diarrhea_13__42255	Reported
Diarrhea_13__64316	Reported
Diarrhea_13__66017	Reported
Diarrhea_13__68754	Reported
Diarrhea_13__69928	Reported
Diarrhea_13__71033	Reported
Diarrhea_13__71063	Reported
Diarrhea_13__74002	Reported
Diarrhea_13__75957	Reported
Diarrhea_13__77035	Reported
Diarrhea_13__81508	Reported
Diarrhea_13__83981	Reported
Diarrhea_14__100941	Reported
Diarrhea_14__1027	Reported
Diarrhea_14__106230	Reported
Diarrhea_14__108387	Reported
Diarrhea_14__1890	Reported
Diarrhea_14__22085	Reported
Diarrhea_14__2272	Reported
Diarrhea_14__33233	Reported
Diarrhea_14__33405	Reported
Diarrhea_14__38785	Reported
Diarrhea_14__46308	Reported
Diarrhea_14__46879	Reported
Diarrhea_14__57721	Reported
Diarrhea_14__57841	Reported
Diarrhea_14__62176	Reported
Diarrhea_14__66969	Reported
Diarrhea_14__77268	Reported
Diarrhea_14__77413	Reported
Diarrhea_14__77446	Reported
Diarrhea_14__77690	Reported
Diarrhea_14__78161	Reported
Diarrhea_14__81860	Reported
Diarrhea_14__82043	Reported
Diarrhea_14__82915	Reported
Diarrhea_14__85396	Reported
Diarrhea_14__90529	Reported
Diarrhea_14__90611	Reported
Diarrhea_14__9096	Reported
Diarrhea_14__97147	Reported
Diarrhea_14__97561	Reported
Diarrhea_15__103110	Reported
Diarrhea_15__104495	Reported
Diarrhea_15__10989	Reported
Diarrhea_15__112662	Reported
Diarrhea_15__121284	Reported
Diarrhea_15__123601	Reported
Diarrhea_15__128136	Reported
Diarrhea_15__1586	Reported
Diarrhea_15__29976	Reported
Diarrhea_15__459	Reported
Diarrhea_15__67052	Reported
Diarrhea_15__7940	Reported
Diarrhea_15__91624	Reported
Diarrhea_16__100782	Reported
Diarrhea_16__102247	Reported
Diarrhea_16__10838	Reported
Diarrhea_16__109830	Reported
Diarrhea_16__111341	Reported
Diarrhea_16__111557	Reported
Diarrhea_16__11808	Reported
Diarrhea_16__1370	Reported
Diarrhea_16__13790	Reported
Diarrhea_16__15383	Reported
Diarrhea_16__18236	Reported
Diarrhea_16__18372	Reported
Diarrhea_16__20963	Reported
Diarrhea_16__23147	Reported
Diarrhea_16__26171	Reported
Diarrhea_16__30353	Reported
Diarrhea_16__32763	Reported
Diarrhea_16__42123	Reported
Diarrhea_16__45883	Reported
Diarrhea_16__49950	Reported
Diarrhea_16__60661	Reported
Diarrhea_16__63880	Reported
Diarrhea_16__66805	Reported
Diarrhea_16__68663	Reported
Diarrhea_16__72935	Reported
Diarrhea_16__77437	Reported
Diarrhea_16__78617	Reported
Diarrhea_16__8108	Reported
Diarrhea_16__87669	Reported
Diarrhea_16__88008	Reported
Diarrhea_16__89846	Reported
Diarrhea_16__99502	Reported
Diarrhea_17__100219	Reported
Diarrhea_17__10662	Reported
Diarrhea_17__12372	Reported
Diarrhea_17__1270	Reported
Diarrhea_17__16007	Reported
Diarrhea_17__21924	Reported
Diarrhea_17__21947	Reported
Diarrhea_17__22884	Reported
Diarrhea_17__23200	Reported
Diarrhea_17__27714	Reported
Diarrhea_17__28558	Reported
Diarrhea_17__31704	Reported
Diarrhea_17__34556	Reported
Diarrhea_17__35218	Reported
Diarrhea_17__4149	Reported
Diarrhea_17__41720	Reported
Diarrhea_17__46667	Reported
Diarrhea_17__48471	Reported
Diarrhea_17__49089	Reported
Diarrhea_17__49192	Reported
Diarrhea_17__54533	Reported
Diarrhea_17__55684	Reported
Diarrhea_17__57378	Reported
Diarrhea_17__59242	Reported
Diarrhea_17__59751	Reported
Diarrhea_17__62701	Reported
Diarrhea_17__63094	Reported
Diarrhea_17__63123	Reported
Diarrhea_17__63314	Reported
Diarrhea_17__66289	Reported
Diarrhea_17__66737	Reported
Diarrhea_17__70713	Reported
Diarrhea_17__73729	Reported
Diarrhea_17__74362	Reported
Diarrhea_17__76407	Reported
Diarrhea_17__81664	Reported
Diarrhea_17__83443	Reported
Diarrhea_17__86639	Reported
Diarrhea_17__8963	Reported
Diarrhea_17__92617	Reported
Diarrhea_17__93934	Reported
Diarrhea_17__9715	Reported
Diarrhea_17__97929	Reported
Diarrhea_17__9823	Reported
Diarrhea_17__9928	Reported
Diarrhea_17__99610	Reported
Diarrhea_18__104528	Reported
Diarrhea_18__106911	Reported
Diarrhea_18__108852	Reported
Diarrhea_18__109765	Reported
Diarrhea_18__11569	Reported
Diarrhea_18__15752	Reported
Diarrhea_18__30194	Reported
Diarrhea_18__32647	Reported
Diarrhea_18__35593	Reported
Diarrhea_18__43217	Reported
Diarrhea_18__49141	Reported
Diarrhea_18__56301	Reported
Diarrhea_18__57708	Reported
Diarrhea_18__6428	Reported
Diarrhea_18__73156	Reported
Diarrhea_18__80689	Reported
Diarrhea_18__82611	Reported
Diarrhea_18__86689	Reported
Diarrhea_18__94705	Reported
Diarrhea_18__99919	Reported
Diarrhea_19__10479	Reported
Diarrhea_19__10513	Reported
Diarrhea_19__12015	Reported
Diarrhea_19__13353	Reported
Diarrhea_19__13466	Reported
Diarrhea_19__17696	Reported
Diarrhea_19__18888	Reported
Diarrhea_19__19382	Reported
Diarrhea_19__22599	Reported
Diarrhea_19__24451	Reported
Diarrhea_19__24563	Reported
Diarrhea_19__30827	Reported
Diarrhea_19__33125	Reported
Diarrhea_19__40568	Reported
Diarrhea_19__40873	Reported
Diarrhea_19__46221	Reported
Diarrhea_19__47744	Reported
Diarrhea_19__48089	Reported
Diarrhea_19__50978	Reported
Diarrhea_19__51201	Reported
Diarrhea_19__51500	Reported
Diarrhea_19__52747	Reported
Diarrhea_19__5644	Reported
Diarrhea_19__60184	Reported
Diarrhea_19__6177	Reported
Diarrhea_19__64624	Reported
Diarrhea_19__66135	Reported
Diarrhea_19__8722	Reported
Diarrhea_19__9558	Reported
Diarrhea_19__9928	Reported
Diarrhea_1__10547	Reported
Diarrhea_1__13470	Reported
Diarrhea_1__14142	Reported
Diarrhea_1__14866	Reported
Diarrhea_1__15932	Reported
Diarrhea_1__26717	Reported
Diarrhea_1__34289	Reported
Diarrhea_1__40684	Reported
Diarrhea_1__41784	Reported
Diarrhea_1__43633	Reported
Diarrhea_1__44703	Reported
Diarrhea_1__47717	Reported
Diarrhea_1__48401	Reported
Diarrhea_1__49589	Reported
Diarrhea_1__51852	Reported
Diarrhea_1__53481	Reported
Diarrhea_1__54845	Reported
Diarrhea_1__55067	Reported
Diarrhea_1__58338	Reported
Diarrhea_1__59312	Reported
Diarrhea_1__59892	Reported
Diarrhea_1__6406	Reported
Diarrhea_1__8491	Reported
Diarrhea_1__9755	Reported
Diarrhea_20__15599	Reported
Diarrhea_20__1581	Reported
Diarrhea_20__16922	Reported
Diarrhea_20__19304	Reported
Diarrhea_20__19869	Reported
Diarrhea_20__22306	Reported
Diarrhea_20__22830	Reported
Diarrhea_20__23478	Reported
Diarrhea_20__26772	Reported
Diarrhea_20__29517	Reported
Diarrhea_20__3124	Reported
Diarrhea_20__32231	Reported
Diarrhea_20__37242	Reported
Diarrhea_20__39732	Reported
Diarrhea_20__39919	Reported
Diarrhea_20__40408	Reported
Diarrhea_20__41300	Reported
Diarrhea_20__43920	Reported
Diarrhea_20__45454	Reported
Diarrhea_20__45776	Reported
Diarrhea_20__45925	Reported
Diarrhea_20__47821	Reported
Diarrhea_20__48894	Reported
Diarrhea_20__4950	Reported
Diarrhea_20__49698	Reported
Diarrhea_20__53099	Reported
Diarrhea_20__54866	Reported
Diarrhea_20__57520	Reported
Diarrhea_20__59484	Reported
Diarrhea_20__59655	Reported
Diarrhea_20__59895	Reported
Diarrhea_20__60803	Reported
Diarrhea_20__6081	Reported
Diarrhea_20__62375	Reported
Diarrhea_20__6428	Reported
Diarrhea_20__9937	Reported
Diarrhea_21__12185	Reported
Diarrhea_21__12531	Reported
Diarrhea_21__15842	Reported
Diarrhea_21__16742	Reported
Diarrhea_21__17991	Reported
Diarrhea_21__19670	Reported
Diarrhea_21__20486	Reported
Diarrhea_21__21187	Reported
Diarrhea_21__27512	Reported
Diarrhea_21__30330	Reported
Diarrhea_21__36949	Reported
Diarrhea_21__40317	Reported
Diarrhea_21__41367	Reported
Diarrhea_21__4496	Reported
Diarrhea_21__45532	Reported
Diarrhea_21__49424	Reported
Diarrhea_21__51673	Reported
Diarrhea_21__55296	Reported
Diarrhea_21__56822	Reported
Diarrhea_21__60890	Reported
Diarrhea_21__63988	Reported
Diarrhea_21__6433	Reported
Diarrhea_21__67480	Reported
Diarrhea_21__68200	Reported
Diarrhea_21__71541	Reported
Diarrhea_21__73777	Reported
Diarrhea_21__75754	Reported
Diarrhea_21__77200	Reported
Diarrhea_21__79296	Reported
Diarrhea_21__79531	Reported
Diarrhea_21__88716	Reported
Diarrhea_21__93772	Reported
Diarrhea_21__9733	Reported
Diarrhea_21__97718	Reported
Diarrhea_22__10536	Reported
Diarrhea_22__12776	Reported
Diarrhea_22__18447	Reported
Diarrhea_22__19667	Reported
Diarrhea_22__21215	Reported
Diarrhea_22__21721	Reported
Diarrhea_22__22308	Reported
Diarrhea_22__22419	Reported
Diarrhea_22__24947	Reported
Diarrhea_22__25461	Reported
Diarrhea_22__35372	Reported
Diarrhea_22__38289	Reported
Diarrhea_22__38548	Reported
Diarrhea_22__41963	Reported
Diarrhea_22__45085	Reported
Diarrhea_22__47843	Reported
Diarrhea_22__48395	Reported
Diarrhea_22__49155	Reported
Diarrhea_22__49175	Reported
Diarrhea_22__49723	Reported
Diarrhea_22__499	Reported
Diarrhea_22__51812	Reported
Diarrhea_22__52126	Reported
Diarrhea_22__52342	Reported
Diarrhea_22__52990	Reported
Diarrhea_22__53479	Reported
Diarrhea_22__56017	Reported
Diarrhea_22__56067	Reported
Diarrhea_22__57070	Reported
Diarrhea_22__57225	Reported
Diarrhea_22__58753	Reported
Diarrhea_22__66472	Reported
Diarrhea_22__72927	Reported
Diarrhea_22__73643	Reported
Diarrhea_22__75904	Reported
Diarrhea_22__76217	Reported
Diarrhea_22__76489	Reported
Diarrhea_22__76584	Reported
Diarrhea_22__79997	Reported
Diarrhea_22__80153	Reported
Diarrhea_22__8359	Reported
Diarrhea_22__87508	Reported
Diarrhea_22__89503	Reported
Diarrhea_22__90535	Reported
Diarrhea_22__9218	Reported
Diarrhea_22__93175	Reported
Diarrhea_22__94058	Reported
Diarrhea_22__94889	Reported
Diarrhea_23__14007	Reported
Diarrhea_23__14736	Reported
Diarrhea_23__15258	Reported
Diarrhea_23__16218	Reported
Diarrhea_23__24821	Reported
Diarrhea_23__25805	Reported
Diarrhea_23__33556	Reported
Diarrhea_23__34511	Reported
Diarrhea_23__36448	Reported
Diarrhea_23__36464	Reported
Diarrhea_23__40967	Reported
Diarrhea_23__41904	Reported
Diarrhea_23__43439	Reported
Diarrhea_23__45806	Reported
Diarrhea_23__56622	Reported
Diarrhea_23__6865	Reported
Diarrhea_23__69741	Reported
Diarrhea_23__70405	Reported
Diarrhea_23__71489	Reported
Diarrhea_23__71799	Reported
Diarrhea_23__73218	Reported
Diarrhea_23__74237	Reported
Diarrhea_23__74978	Reported
Diarrhea_23__76778	Reported
Diarrhea_23__77803	Reported
Diarrhea_23__77915	Reported
Diarrhea_23__79611	Reported
Diarrhea_23__79878	Reported
Diarrhea_23__79905	Reported
Diarrhea_23__87857	Reported
Diarrhea_23__95124	Reported
Diarrhea_23__95778	Reported
Diarrhea_23__96617	Reported
Diarrhea_23__97354	Reported
Diarrhea_24__11690	Reported
Diarrhea_24__12361	Reported
Diarrhea_24__18381	Reported
Diarrhea_24__18382	Reported
Diarrhea_24__20215	Reported
Diarrhea_24__22395	Reported
Diarrhea_24__22667	Reported
Diarrhea_24__25430	Reported
Diarrhea_24__27094	Reported
Diarrhea_24__27297	Reported
Diarrhea_24__30360	Reported
Diarrhea_24__32339	Reported
Diarrhea_24__32636	Reported
Diarrhea_24__35136	Reported
Diarrhea_24__36171	Reported
Diarrhea_24__36457	Reported
Diarrhea_24__42023	Reported
Diarrhea_24__4261	Reported
Diarrhea_24__42769	Reported
Diarrhea_24__46097	Reported
Diarrhea_24__46365	Reported
Diarrhea_24__55407	Reported
Diarrhea_24__55504	Reported
Diarrhea_24__5588	Reported
Diarrhea_24__58444	Reported
Diarrhea_24__61570	Reported
Diarrhea_24__65016	Reported
Diarrhea_24__65333	Reported
Diarrhea_24__7324	Reported
Diarrhea_24__8478	Reported
Diarrhea_25__16584	Reported
Diarrhea_25__16722	Reported
Diarrhea_25__16750	Reported
Diarrhea_25__2450	Reported
Diarrhea_25__27515	Reported
Diarrhea_25__6367	Reported
Diarrhea_25__6741	Reported
Diarrhea_26__10657	Reported
Diarrhea_26__13240	Reported
Diarrhea_26__15050	Reported
Diarrhea_26__15912	Reported
Diarrhea_26__29666	Reported
Diarrhea_26__30830	Reported
Diarrhea_26__35308	Reported
Diarrhea_26__35338	Reported
Diarrhea_26__36350	Reported
Diarrhea_26__37503	Reported
Diarrhea_26__38034	Reported
Diarrhea_26__41202	Reported
Diarrhea_26__4301	Reported
Diarrhea_26__43561	Reported
Diarrhea_26__48006	Reported
Diarrhea_26__49737	Reported
Diarrhea_26__49823	Reported
Diarrhea_26__51231	Reported
Diarrhea_26__53505	Reported
Diarrhea_26__66474	Reported
Diarrhea_26__78481	Reported
Diarrhea_26__78512	Reported
Diarrhea_26__78658	Reported
Diarrhea_26__7909	Reported
Diarrhea_26__79181	Reported
Diarrhea_26__85624	Reported
Diarrhea_26__8655	Reported
Diarrhea_27__11872	Reported
Diarrhea_27__12309	Reported
Diarrhea_27__13235	Reported
Diarrhea_27__14070	Reported
Diarrhea_27__14747	Reported
Diarrhea_27__14758	Reported
Diarrhea_27__16544	Reported
Diarrhea_27__16551	Reported
Diarrhea_27__18321	Reported
Diarrhea_27__18568	Reported
Diarrhea_27__18656	Reported
Diarrhea_27__20640	Reported
Diarrhea_27__21640	Reported
Diarrhea_27__24770	Reported
Diarrhea_27__282	Reported
Diarrhea_27__3126	Reported
Diarrhea_27__3686	Reported
Diarrhea_27__427	Reported
Diarrhea_27__4475	Reported
Diarrhea_27__4838	Reported
Diarrhea_27__4863	Reported
Diarrhea_27__4982	Reported
Diarrhea_27__6054	Reported
Diarrhea_27__639	Reported
Diarrhea_27__7007	Reported
Diarrhea_27__7280	Reported
Diarrhea_27__7394	Reported
Diarrhea_27__7597	Reported
Diarrhea_27__8178	Reported
Diarrhea_27__8309	Reported
Diarrhea_27__9256	Reported
Diarrhea_27__9275	Reported
Diarrhea_28__13926	Reported
Diarrhea_28__15388	Reported
Diarrhea_28__25434	Reported
Diarrhea_28__39629	Reported
Diarrhea_28__40516	Reported
Diarrhea_28__40650	Reported
Diarrhea_28__4154	Reported
Diarrhea_28__46629	Reported
Diarrhea_28__51441	Reported
Diarrhea_28__53716	Reported
Diarrhea_28__58737	Reported
Diarrhea_28__58949	Reported
Diarrhea_28__59266	Reported
Diarrhea_28__66712	Reported
Diarrhea_28__68405	Reported
Diarrhea_28__6924	Reported
Diarrhea_28__7061	Reported
Diarrhea_28__7245	Reported
Diarrhea_28__85100	Reported
Diarrhea_28__86721	Reported
Diarrhea_28__86899	Reported
Diarrhea_28__87860	Reported
Diarrhea_29__100684	Reported
Diarrhea_29__102549	Reported
Diarrhea_29__103584	Reported
Diarrhea_29__109314	Reported
Diarrhea_29__112865	Reported
Diarrhea_29__116147	Reported
Diarrhea_29__116445	Reported
Diarrhea_29__12354	Reported
Diarrhea_29__12523	Reported
Diarrhea_29__12657	Reported
Diarrhea_29__14655	Reported
Diarrhea_29__19035	Reported
Diarrhea_29__26457	Reported
Diarrhea_29__33709	Reported
Diarrhea_29__33883	Reported
Diarrhea_29__35203	Reported
Diarrhea_29__36872	Reported
Diarrhea_29__37207	Reported
Diarrhea_29__39125	Reported
Diarrhea_29__39503	Reported
Diarrhea_29__40626	Reported
Diarrhea_29__41595	Reported
Diarrhea_29__41817	Reported
Diarrhea_29__4565	Reported
Diarrhea_29__46362	Reported
Diarrhea_29__4870	Reported
Diarrhea_29__5156	Reported
Diarrhea_29__55105	Reported
Diarrhea_29__57873	Reported
Diarrhea_29__60722	Reported
Diarrhea_29__64527	Reported
Diarrhea_29__6514	Reported
Diarrhea_29__67241	Reported
Diarrhea_29__68118	Reported
Diarrhea_29__69890	Reported
Diarrhea_29__71355	Reported
Diarrhea_29__73479	Reported
Diarrhea_29__73735	Reported
Diarrhea_29__74064	Reported
Diarrhea_29__77036	Reported
Diarrhea_29__78981	Reported
Diarrhea_29__83528	Reported
Diarrhea_29__90940	Reported
Diarrhea_29__94441	Reported
Diarrhea_29__95096	Reported
Diarrhea_29__95308	Reported
Diarrhea_29__96776	Reported
Diarrhea_29__97066	Reported
Diarrhea_2__15861	Reported
Diarrhea_2__17292	Reported
Diarrhea_2__29754	Reported
Diarrhea_2__41834	Reported
Diarrhea_2__48159	Reported
Diarrhea_2__49017	Reported
Diarrhea_30__12171	Reported
Diarrhea_30__1325	Reported
Diarrhea_30__1334	Reported
Diarrhea_30__26008	Reported
Diarrhea_30__374	Reported
Diarrhea_30__37540	Reported
Diarrhea_30__44766	Reported
Diarrhea_30__55544	Reported
Diarrhea_30__56477	Reported
Diarrhea_30__60628	Reported
Diarrhea_30__62592	Reported
Diarrhea_30__71319	Reported
Diarrhea_30__76409	Reported
Diarrhea_30__78885	Reported
Diarrhea_30__80190	Reported
Diarrhea_30__80351	Reported
Diarrhea_30__95756	Reported
Diarrhea_3__13781	Reported
Diarrhea_3__15626	Reported
Diarrhea_3__1808	Reported
Diarrhea_3__25955	Reported
Diarrhea_3__29113	Reported
Diarrhea_3__33492	Reported
Diarrhea_3__38293	Reported
Diarrhea_3__3835	Reported
Diarrhea_3__42697	Reported
Diarrhea_3__45981	Reported
Diarrhea_3__63013	Reported
Diarrhea_4__10686	Reported
Diarrhea_4__11939	Reported
Diarrhea_4__13571	Reported
Diarrhea_4__14379	Reported
Diarrhea_4__18887	Reported
Diarrhea_4__22910	Reported
Diarrhea_4__25654	Reported
Diarrhea_4__2992	Reported
Diarrhea_4__3280	Reported
Diarrhea_4__4164	Reported
Diarrhea_4__6700	Reported
Diarrhea_5__13264	Reported
Diarrhea_5__18079	Reported
Diarrhea_5__19264	Reported
Diarrhea_5__19515	Reported
Diarrhea_5__3950	Reported
Diarrhea_5__414	Reported
Diarrhea_5__5524	Reported
Diarrhea_5__6543	Reported
Diarrhea_5__6568	Reported
Diarrhea_6__14799	Reported
Diarrhea_6__4986	Reported
Diarrhea_6__7401	Reported
Diarrhea_7__11500	Reported
Diarrhea_7__19388	Reported
Diarrhea_7__2813	Reported
Diarrhea_7__33093	Reported
Diarrhea_7__3475	Reported
Diarrhea_7__36619	Reported
Diarrhea_7__38792	Reported
Diarrhea_7__53515	Reported
Diarrhea_7__57015	Reported
Diarrhea_7__61235	Reported
Diarrhea_7__66213	Reported
Diarrhea_7__67574	Reported
Diarrhea_7__67617	Reported
Diarrhea_7__68326	Reported
Diarrhea_7__72311	Reported
Diarrhea_7__73906	Reported
Diarrhea_7__85984	Reported
Diarrhea_7__9869	Reported
Diarrhea_8__10824	Reported
Diarrhea_8__11465	Reported
Diarrhea_8__12287	Reported
Diarrhea_8__15707	Reported
Diarrhea_8__1909	Reported
Diarrhea_8__22536	Reported
Diarrhea_8__3156	Reported
Diarrhea_8__636	Reported
Diarrhea_8__7458	Reported
Diarrhea_9__11121	Reported
Diarrhea_9__13807	Reported
Diarrhea_9__18795	Reported
Diarrhea_9__19157	Reported
Diarrhea_9__20913	Reported
Diarrhea_9__24329	Reported
Diarrhea_9__2590	Reported
Diarrhea_9__29607	Reported
Diarrhea_9__31287	Reported
Diarrhea_9__31424	Reported
Diarrhea_9__31505	Reported
Diarrhea_9__34360	Reported
Diarrhea_9__36013	Reported
Diarrhea_9__36982	Reported
Diarrhea_9__42156	Reported
Diarrhea_9__42847	Reported
Diarrhea_9__5539	Reported
Diarrhea_9__739	Reported
Health_10__100498	Reported
Health_10__10130	Reported
Health_10__102108	Reported
Health_10__103665	Reported
Health_10__109374	Reported
Health_10__109447	Reported
Health_10__112989	Reported
Health_10__114522	Reported
Health_10__13440	Reported
Health_10__19445	Reported
Health_10__21517	Reported
Health_10__21671	Reported
Health_10__26135	Reported
Health_10__27132	Reported
Health_10__29974	Reported
Health_10__30268	Reported
Health_10__36089	Reported
Health_10__41664	Reported
Health_10__45737	Reported
Health_10__48812	Reported
Health_10__49163	Reported
Health_10__52133	Reported
Health_10__52722	Reported
Health_10__56914	Reported
Health_10__58051	Reported
Health_10__60228	Reported
Health_10__63065	Reported
Health_10__68590	Reported
Health_10__70853	Reported
Health_10__71238	Reported
Health_10__71280	Reported
Health_10__7146	Reported
Health_10__74834	Reported
Health_10__75284	Reported
Health_10__75805	Reported
Health_10__78006	Reported
Health_10__80617	Reported
Health_10__81345	Reported
Health_10__82873	Reported
Health_10__87563	Reported
Health_10__9523	Reported
Health_11__1253	Reported
Health_11__13539	Reported
Health_11__17899	Reported
Health_11__20243	Reported
Health_11__23388	Reported
Health_11__23688	Reported
Health_11__2385	Reported
Health_11__25220	Reported
Health_11__26470	Reported
Health_11__26858	Reported
Health_11__29691	Reported
Health_11__40903	Reported
Health_11__47558	Reported
Health_11__52397	Reported
Health_11__60664	Reported
Health_11__63387	Reported
Health_11__63754	Reported
Health_11__67713	Reported
Health_11__71635	Reported
Health_11__73736	Reported
Health_11__81739	Reported
Health_11__87100	Reported
Health_11__95117	Reported
Health_11__96226	Reported
Health_11__98590	Reported
Health_12__10272	Reported
Health_12__15750	Reported
Health_12__1612	Reported
Health_12__17135	Reported
Health_12__18292	Reported
Health_12__23477	Reported
Health_12__36949	Reported
Health_12__39935	Reported
Health_12__40386	Reported
Health_12__40706	Reported
Health_12__4125	Reported
Health_12__47532	Reported
Health_12__52719	Reported
Health_12__62508	Reported
Health_12__63315	Reported
Health_12__65660	Reported
Health_12__67092	Reported
Health_12__71343	Reported
Health_12__79682	Reported
Health_12__86176	Reported
Health_12__88280	Reported
Health_12__9142	Reported
Health_12__96285	Reported
Health_12__98497	Reported
Health_12__99711	Reported
Health_13__12591	Reported
Health_13__13030	Reported
Health_13__13810	Reported
Health_13__17755	Reported
Health_13__32273	Reported
Health_13__35715	Reported
Health_13__38683	Reported
Health_13__53429	Reported
Health_13__54522	Reported
Health_13__6758	Reported
Health_13__67593	Reported
Health_13__68367	Reported
Health_13__71548	Reported
Health_13__72137	Reported
Health_13__75113	Reported
Health_13__83652	Reported
Health_13__84595	Reported
Health_13__84868	Reported
Health_13__84893	Reported
Health_13__85294	Reported
Health_13__87681	Reported
Health_13__88245	Reported
Health_14__101359	Reported
Health_14__115094	Reported
Health_14__115110	Reported
Health_14__115931	Reported
Health_14__119082	Reported
Health_14__1256	Reported
Health_14__125759	Reported
Health_14__13270	Reported
Health_14__17969	Reported
Health_14__26605	Reported
Health_14__28312	Reported
Health_14__28652	Reported
Health_14__32322	Reported
Health_14__34374	Reported
Health_14__46930	Reported
Health_14__52486	Reported
Health_14__55840	Reported
Health_14__63328	Reported
Health_14__67826	Reported
Health_14__68288	Reported
Health_14__73010	Reported
Health_14__74883	Reported
Health_14__75908	Reported
Health_14__79985	Reported
Health_14__92125	Reported
Health_14__94045	Reported
Health_14__97826	Reported
Health_14__98571	Reported
Health_14__9982	Reported
Health_15__12443	Reported
Health_15__12579	Reported
Health_15__21240	Reported
Health_15__22667	Reported
Health_15__33582	Reported
Health_15__34505	Reported
Health_15__38563	Reported
Health_15__39927	Reported
Health_15__40147	Reported
Health_15__4067	Reported
Health_15__41735	Reported
Health_15__47985	Reported
Health_15__49703	Reported
Health_15__55762	Reported
Health_15__61810	Reported
Health_15__6819	Reported
Health_15__72335	Reported
Health_15__8332	Reported
Health_16__1092	Reported
Health_16__13354	Reported
Health_16__18825	Reported
Health_16__19597	Reported
Health_16__19870	Reported
Health_16__20395	Reported
Health_16__20610	Reported
Health_16__23648	Reported
Health_16__24154	Reported
Health_16__24981	Reported
Health_16__2814	Reported
Health_16__3025	Reported
Health_16__32201	Reported
Health_16__32347	Reported
Health_16__3288	Reported
Health_16__37287	Reported
Health_16__39723	Reported
Health_16__40799	Reported
Health_16__42461	Reported
Health_16__44818	Reported
Health_16__48748	Reported
Health_16__52238	Reported
Health_16__53146	Reported
Health_16__53181	Reported
Health_16__53472	Reported
Health_16__53918	Reported
Health_16__55086	Reported
Health_16__66726	Reported
Health_16__6762	Reported
Health_16__68426	Reported
Health_16__71102	Reported
Health_16__71111	Reported
Health_16__73761	Reported
Health_16__74501	Reported
Health_16__7602	Reported
Health_16__77532	Reported
Health_16__78778	Reported
Health_17__12670	Reported
Health_17__22735	Reported
Health_17__25528	Reported
Health_17__25903	Reported
Health_17__27824	Reported
Health_17__31169	Reported
Health_17__31662	Reported
Health_17__31731	Reported
Health_17__40091	Reported
Health_17__47370	Reported
Health_17__50472	Reported
Health_17__53381	Reported
Health_17__54697	Reported
Health_17__5615	Reported
Health_17__5835	Reported
Health_17__61494	Reported
Health_17__63751	Reported
Health_17__6774	Reported
Health_17__69220	Reported
Health_17__72361	Reported
Health_17__75949	Reported
Health_17__87682	Reported
Health_17__89813	Reported
Health_18__37090	Reported
Health_18__37936	Reported
Health_18__44165	Reported
Health_18__48795	Reported
Health_18__49997	Reported
Health_18__54628	Reported
Health_18__58708	Reported
Health_18__86476	Reported
Health_18__88300	Reported
Health_18__99654	Reported
Health_19__1574	Reported
Health_19__24181	Reported
Health_19__25173	Reported
Health_19__25909	Reported
Health_19__25935	Reported
Health_19__35553	Reported
Health_19__3774	Reported
Health_19__39917	Reported
Health_19__39962	Reported
Health_19__40242	Reported
Health_19__40612	Reported
Health_19__48743	Reported
Health_19__50854	Reported
Health_19__52313	Reported
Health_19__52943	Reported
Health_19__54021	Reported
Health_19__56569	Reported
Health_19__57286	Reported
Health_19__5737	Reported
Health_19__57396	Reported
Health_19__59828	Reported
Health_19__6786	Reported
Health_19__7112	Reported
Health_19__9423	Reported
Health_1__11518	Reported
Health_1__12992	Reported
Health_1__13014	Reported
Health_1__13469	Reported
Health_1__13761	Reported
Health_1__14542	Reported
Health_1__17707	Reported
Health_1__25734	Reported
Health_1__25869	Reported
Health_1__28779	Reported
Health_1__29837	Reported
Health_1__31856	Reported
Health_1__31930	Reported
Health_1__36182	Reported
Health_1__38451	Reported
Health_1__39096	Reported
Health_1__39202	Reported
Health_1__452	Reported
Health_1__45957	Reported
Health_1__9998	Reported
Health_20__10907	Reported
Health_20__1119	Reported
Health_20__11540	Reported
Health_20__11579	Reported
Health_20__12342	Reported
Health_20__14251	Reported
Health_20__17124	Reported
Health_20__18345	Reported
Health_20__20559	Reported
Health_20__20681	Reported
Health_20__25048	Reported
Health_20__26697	Reported
Health_20__28251	Reported
Health_20__28654	Reported
Health_20__33112	Reported
Health_20__34014	Reported
Health_20__35407	Reported
Health_20__3573	Reported
Health_20__38923	Reported
Health_20__40013	Reported
Health_20__42141	Reported
Health_20__4281	Reported
Health_20__46397	Reported
Health_20__4703	Reported
Health_20__47183	Reported
Health_20__48830	Reported
Health_20__49070	Reported
Health_20__51304	Reported
Health_20__57058	Reported
Health_20__58536	Reported
Health_20__63008	Reported
Health_20__6689	Reported
Health_21__10874	Reported
Health_21__11429	Reported
Health_21__15499	Reported
Health_21__17524	Reported
Health_21__18369	Reported
Health_21__1955	Reported
Health_21__23742	Reported
Health_21__26023	Reported
Health_21__27328	Reported
Health_21__28698	Reported
Health_21__30833	Reported
Health_21__33745	Reported
Health_21__38680	Reported
Health_21__40403	Reported
Health_21__40440	Reported
Health_21__45272	Reported
Health_21__47710	Reported
Health_21__4924	Reported
Health_21__51996	Reported
Health_21__54900	Reported
Health_21__56129	Reported
Health_21__61595	Reported
Health_21__62719	Reported
Health_21__63802	Reported
Health_21__64277	Reported
Health_21__64468	Reported
Health_21__71752	Reported
Health_21__72453	Reported
Health_21__75189	Reported
Health_21__75721	Reported
Health_21__76215	Reported
Health_21__77855	Reported
Health_21__8111	Reported
Health_22__15258	Reported
Health_22__17760	Reported
Health_22__22945	Reported
Health_22__24437	Reported
Health_22__24566	Reported
Health_22__31254	Reported
Health_22__31504	Reported
Health_22__33740	Reported
Health_22__36201	Reported
Health_22__36566	Reported
Health_22__39672	Reported
Health_22__41334	Reported
Health_22__41364	Reported
Health_22__42124	Reported
Health_22__48319	Reported
Health_22__51203	Reported
Health_22__52644	Reported
Health_22__52756	Reported
Health_22__5327	Reported
Health_22__53473	Reported
Health_22__55542	Reported
Health_22__56454	Reported
Health_22__60694	Reported
Health_22__62579	Reported
Health_22__63677	Reported
Health_22__65775	Reported
Health_22__68451	Reported
Health_22__71746	Reported
Health_22__77580	Reported
Health_22__78682	Reported
Health_22__79334	Reported
Health_22__81594	Reported
Health_22__85719	Reported
Health_22__9595	Reported
Health_23__10816	Reported
Health_23__11897	Reported
Health_23__16409	Reported
Health_23__18419	Reported
Health_23__19840	Reported
Health_23__20990	Reported
Health_23__21934	Reported
Health_23__25516	Reported
Health_23__25810	Reported
Health_23__25824	Reported
Health_23__27541	Reported
Health_23__3004	Reported
Health_23__32917	Reported
Health_23__32959	Reported
Health_23__35734	Reported
Health_23__36852	Reported
Health_23__39554	Reported
Health_23__43915	Reported
Health_23__44678	Reported
Health_23__44961	Reported
Health_23__45110	Reported
Health_23__46527	Reported
Health_23__46562	Reported
Health_23__50082	Reported
Health_23__56517	Reported
Health_23__59203	Reported
Health_23__60886	Reported
Health_23__65458	Reported
Health_23__66148	Reported
Health_23__6671	Reported
Health_24__10322	Reported
Health_24__10472	Reported
Health_24__13373	Reported
Health_24__17263	Reported
Health_24__23215	Reported
Health_24__23593	Reported
Health_24__26053	Reported
Health_24__31711	Reported
Health_24__33134	Reported
Health_24__35744	Reported
Health_24__37002	Reported
Health_24__38804	Reported
Health_24__40785	Reported
Health_24__46014	Reported
Health_24__50300	Reported
Health_24__50943	Reported
Health_24__51143	Reported
Health_24__54327	Reported
Health_24__54473	Reported
Health_24__58667	Reported
Health_24__5907	Reported
Health_24__62911	Reported
Health_24__64562	Reported
Health_24__68189	Reported
Health_24__71951	Reported
Health_24__75024	Reported
Health_24__7512	Reported
Health_24__76776	Reported
Health_24__77223	Reported
Health_24__81092	Reported
Health_24__81292	Reported
Health_24__82738	Reported
Health_24__86533	Reported
Health_24__8748	Reported
Health_24__88571	Reported
Health_24__9523	Reported
Health_24__9531	Reported
Health_25__104526	Reported
Health_25__108149	Reported
Health_25__109593	Reported
Health_25__116222	Reported
Health_25__119645	Reported
Health_25__24533	Reported
Health_25__25848	Reported
Health_25__30914	Reported
Health_25__4906	Reported
Health_25__50885	Reported
Health_25__54162	Reported
Health_25__56919	Reported
Health_25__63991	Reported
Health_25__69178	Reported
Health_25__70982	Reported
Health_25__84095	Reported
Health_25__87210	Reported
Health_25__92906	Reported
Health_25__96876	Reported
Health_25__9790	Reported
Health_26__11230	Reported
Health_26__15168	Reported
Health_26__19997	Reported
Health_26__21759	Reported
Health_26__24566	Reported
Health_26__25822	Reported
Health_26__26260	Reported
Health_26__26442	Reported
Health_26__27728	Reported
Health_26__29098	Reported
Health_26__29851	Reported
Health_26__30483	Reported
Health_26__34649	Reported
Health_26__37680	Reported
Health_26__41393	Reported
Health_26__42693	Reported
Health_26__42760	Reported
Health_26__43384	Reported
Health_26__5080	Reported
Health_26__5266	Reported
Health_26__8984	Reported
Health_27__100581	Reported
Health_27__102048	Reported
Health_27__102302	Reported
Health_27__104475	Reported
Health_27__105159	Reported
Health_27__10847	Reported
Health_27__119812	Reported
Health_27__123658	Reported
Health_27__127526	Reported
Health_27__129698	Reported
Health_27__129937	Reported
Health_27__130920	Reported
Health_27__131669	Reported
Health_27__132301	Reported
Health_27__134792	Reported
Health_27__140987	Reported
Health_27__142711	Reported
Health_27__142940	Reported
Health_27__143631	Reported
Health_27__146838	Reported
Health_27__151587	Reported
Health_27__15260	Reported
Health_27__16571	Reported
Health_27__18576	Reported
Health_27__19745	Reported
Health_27__28065	Reported
Health_27__28366	Reported
Health_27__29388	Reported
Health_27__3366	Reported
Health_27__39135	Reported
Health_27__4000	Reported
Health_27__4770	Reported
Health_27__585	Reported
Health_27__61010	Reported
Health_27__61894	Reported
Health_27__75127	Reported
Health_27__78677	Reported
Health_27__91302	Reported
Health_27__92155	Reported
Health_27__94770	Reported
Health_27__96458	Reported
Health_27__98765	Reported
Health_28__12222	Reported
Health_28__12471	Reported
Health_28__1318	Reported
Health_28__16619	Reported
Health_28__16870	Reported
Health_28__17903	Reported
Health_28__19989	Reported
Health_28__21088	Reported
Health_28__21465	Reported
Health_28__22104	Reported
Health_28__25146	Reported
Health_28__28241	Reported
Health_28__29067	Reported
Health_28__29085	Reported
Health_28__29572	Reported
Health_28__33380	Reported
Health_28__35562	Reported
Health_28__37771	Reported
Health_28__38530	Reported
Health_28__39733	Reported
Health_28__44010	Reported
Health_28__44394	Reported
Health_28__53917	Reported
Health_28__54882	Reported
Health_28__5493	Reported
Health_28__55616	Reported
Health_28__5603	Reported
Health_28__58161	Reported
Health_28__58426	Reported
Health_28__60028	Reported
Health_28__62207	Reported
Health_28__65317	Reported
Health_28__67513	Reported
Health_28__6940	Reported
Health_28__70589	Reported
Health_28__73544	Reported
Health_28__76352	Reported
Health_28__77889	Reported
Health_28__78728	Reported
Health_28__84015	Reported
Health_28__8866	Reported
Health_28__9432	Reported
Health_29__11718	Reported
Health_29__12153	Reported
Health_29__14166	Reported
Health_29__14232	Reported
Health_29__14370	Reported
Health_29__1467	Reported
Health_29__15401	Reported
Health_29__15706	Reported
Health_29__16162	Reported
Health_29__19837	Reported
Health_29__20082	Reported
Health_29__2104	Reported
Health_29__21696	Reported
Health_29__23845	Reported
Health_29__23918	Reported
Health_29__2472	Reported
Health_29__27172	Reported
Health_29__32266	Reported
Health_29__32714	Reported
Health_29__33618	Reported
Health_29__45284	Reported
Health_29__56125	Reported
Health_29__5744	Reported
Health_29__58980	Reported
Health_29__6048	Reported
Health_29__65492	Reported
Health_29__65661	Reported
Health_29__76659	Reported
Health_29__77210	Reported
Health_29__81929	Reported
Health_29__86553	Reported
Health_29__88748	Reported
Health_29__91276	Reported
Health_2__13525	Reported
Health_2__13631	Reported
Health_2__14907	Reported
Health_2__16997	Reported
Health_2__19247	Reported
Health_2__21763	Reported
Health_2__22153	Reported
Health_2__25628	Reported
Health_2__25917	Reported
Health_2__30873	Reported
Health_2__31367	Reported
Health_2__31783	Reported
Health_2__35122	Reported
Health_2__37408	Reported
Health_2__39389	Reported
Health_2__40274	Reported
Health_2__41093	Reported
Health_2__41489	Reported
Health_2__45191	Reported
Health_2__48902	Reported
Health_2__49725	Reported
Health_2__5189	Reported
Health_2__52375	Reported
Health_2__52537	Reported
Health_2__53081	Reported
Health_2__58326	Reported
Health_2__58575	Reported
Health_2__63337	Reported
Health_2__6339	Reported
Health_2__65992	Reported
Health_2__68151	Reported
Health_2__70814	Reported
Health_2__7519	Reported
Health_2__76990	Reported
Health_2__77277	Reported
Health_30__12158	Reported
Health_30__1361	Reported
Health_30__14810	Reported
Health_30__19631	Reported
Health_30__21958	Reported
Health_30__25777	Reported
Health_30__26322	Reported
Health_30__29308	Reported
Health_30__30483	Reported
Health_30__3458	Reported
Health_30__37373	Reported
Health_30__38091	Reported
Health_30__39109	Reported
Health_30__42620	Reported
Health_30__45982	Reported
Health_30__46247	Reported
Health_30__49275	Reported
Health_30__51724	Reported
Health_30__55118	Reported
Health_30__55324	Reported
Health_30__57250	Reported
Health_30__59831	Reported
Health_30__67669	Reported
Health_30__69857	Reported
Health_30__8774	Reported
Health_30__8811	Reported
Health_30__9852	Reported
Health_3__10254	Reported
Health_3__18536	Reported
Health_3__31718	Reported
Health_3__32174	Reported
Health_3__41658	Reported
Health_3__55307	Reported
Health_3__70453	Reported
Health_4__10696	Reported
Health_4__11113	Reported
Health_4__14151	Reported
Health_4__17912	Reported
Health_4__21303	Reported
Health_4__22422	Reported
Health_4__25188	Reported
Health_4__26922	Reported
Health_4__29042	Reported
Health_4__32592	Reported
Health_4__32801	Reported
Health_4__33736	Reported
Health_4__37910	Reported
Health_4__39332	Reported
Health_4__39976	Reported
Health_4__42414	Reported
Health_4__45641	Reported
Health_4__51050	Reported
Health_4__58623	Reported
Health_4__58795	Reported
Health_4__60932	Reported
Health_4__61081	Reported
Health_4__63613	Reported
Health_4__65107	Reported
Health_4__69961	Reported
Health_5__11524	Reported
Health_5__14662	Reported
Health_5__16516	Reported
Health_5__20235	Reported
Health_5__21756	Reported
Health_5__21768	Reported
Health_5__22824	Reported
Health_5__22899	Reported
Health_5__30747	Reported
Health_5__31219	Reported
Health_5__31460	Reported
Health_5__37761	Reported
Health_5__39128	Reported
Health_5__39500	Reported
Health_5__44919	Reported
Health_5__46029	Reported
Health_5__46122	Reported
Health_5__51834	Reported
Health_5__53926	Reported
Health_5__55765	Reported
Health_5__56552	Reported
Health_5__5888	Reported
Health_5__601	Reported
Health_5__6062	Reported
Health_5__66749	Reported
Health_5__68982	Reported
Health_5__6908	Reported
Health_5__69964	Reported
Health_5__71173	Reported
Health_5__71317	Reported
Health_5__74505	Reported
Health_5__75815	Reported
Health_5__77240	Reported
Health_5__81505	Reported
Health_5__83149	Reported
Health_5__889	Reported
Health_5__89970	Reported
Health_5__9648	Reported
Health_5__97294	Reported
Health_6__14977	Reported
Health_6__15554	Reported
Health_6__17372	Reported
Health_6__18118	Reported
Health_6__18211	Reported
Health_6__21342	Reported
Health_6__23550	Reported
Health_6__23777	Reported
Health_6__25294	Reported
Health_6__253	Reported
Health_6__285	Reported
Health_6__30049	Reported
Health_6__31491	Reported
Health_6__3474	Reported
Health_6__35139	Reported
Health_6__36228	Reported
Health_6__40361	Reported
Health_6__40971	Reported
Health_6__41722	Reported
Health_6__43176	Reported
Health_6__43376	Reported
Health_6__43740	Reported
Health_6__44408	Reported
Health_6__44590	Reported
Health_6__47002	Reported
Health_6__47090	Reported
Health_6__47293	Reported
Health_6__53169	Reported
Health_6__55406	Reported
Health_6__56947	Reported
Health_6__59417	Reported
Health_6__61510	Reported
Health_6__64159	Reported
Health_6__68526	Reported
Health_6__68948	Reported
Health_6__69222	Reported
Health_6__71304	Reported
Health_6__71506	Reported
Health_6__73031	Reported
Health_6__74656	Reported
Health_6__75221	Reported
Health_6__76586	Reported
Health_6__7964	Reported
Health_6__8569	Reported
Health_7__101891	Reported
Health_7__102245	Reported
Health_7__103983	Reported
Health_7__11791	Reported
Health_7__15485	Reported
Health_7__17267	Reported
Health_7__18088	Reported
Health_7__24826	Reported
Health_7__3489	Reported
Health_7__36065	Reported
Health_7__37079	Reported
Health_7__3769	Reported
Health_7__43190	Reported
Health_7__48105	Reported
Health_7__52640	Reported
Health_7__55053	Reported
Health_7__55913	Reported
Health_7__61001	Reported
Health_7__67069	Reported
Health_7__67270	Reported
Health_7__6861	Reported
Health_7__73787	Reported
Health_7__75613	Reported
Health_7__75810	Reported
Health_7__76337	Reported
Health_7__78398	Reported
Health_8__12759	Reported
Health_8__19161	Reported
Health_8__24686	Reported
Health_8__28699	Reported
Health_8__29249	Reported
Health_8__3505	Reported
Health_8__3697	Reported
Health_8__37776	Reported
Health_8__38226	Reported
Health_8__39222	Reported
Health_8__39394	Reported
Health_8__4231	Reported
Health_8__4493	Reported
Health_8__5103	Reported
Health_8__64021	Reported
Health_8__68524	Reported
Health_8__70728	Reported
Health_8__70899	Reported
Health_8__71507	Reported
Health_8__76989	Reported
Health_8__79473	Reported
Health_8__79725	Reported
Health_8__80602	Reported
Health_8__81405	Reported
Health_8__81460	Reported
Health_8__82395	Reported
Health_8__84002	Reported
Health_8__88191	Reported
Health_8__93230	Reported
Health_8__934	Reported
Health_9__14452	Reported
Health_9__15710	Reported
Health_9__16207	Reported
Health_9__19132	Reported
Health_9__29625	Reported
Health_9__3528	Reported
Health_9__38355	Reported
Health_9__40557	Reported
Health_9__45233	Reported
Health_9__45838	Reported
Health_9__4841	Reported
Health_9__49735	Reported
Health_9__5049	Reported
Health_9__51367	Reported
Health_9__56511	Reported
Health_9__57797	Reported
Health_9__60325	Reported
Health_9__6473	Reported
Health_9__65310	Reported
Health_9__65464	Reported
Health_9__65513	Reported
Diarrhea_10__10017	Noval
Diarrhea_10__10490	Noval
Diarrhea_10__1066	Noval
Diarrhea_10__10990	Noval
Diarrhea_10__11339	Noval
Diarrhea_10__11827	Noval
Diarrhea_10__11950	Noval
Diarrhea_10__12045	Noval
Diarrhea_10__12956	Noval
Diarrhea_10__13179	Noval
Diarrhea_10__13201	Noval
Diarrhea_10__13842	Noval
Diarrhea_10__13927	Noval
Diarrhea_10__14175	Noval
Diarrhea_10__14590	Noval
Diarrhea_10__15092	Noval
Diarrhea_10__16089	Noval
Diarrhea_10__16174	Noval
Diarrhea_10__16396	Noval
Diarrhea_10__1749	Noval
Diarrhea_10__17939	Noval
Diarrhea_10__18235	Noval
Diarrhea_10__18789	Noval
Diarrhea_10__18972	Noval
Diarrhea_10__19061	Noval
Diarrhea_10__19181	Noval
Diarrhea_10__19873	Noval
Diarrhea_10__20767	Noval
Diarrhea_10__20899	Noval
Diarrhea_10__21312	Noval
Diarrhea_10__21623	Noval
Diarrhea_10__218	Noval
Diarrhea_10__2223	Noval
Diarrhea_10__22606	Noval
Diarrhea_10__22995	Noval
Diarrhea_10__23742	Noval
Diarrhea_10__24126	Noval
Diarrhea_10__25481	Noval
Diarrhea_10__25911	Noval
Diarrhea_10__26181	Noval
Diarrhea_10__27150	Noval
Diarrhea_10__27285	Noval
Diarrhea_10__28741	Noval
Diarrhea_10__28894	Noval
Diarrhea_10__29033	Noval
Diarrhea_10__29308	Noval
Diarrhea_10__29331	Noval
Diarrhea_10__29343	Noval
Diarrhea_10__29395	Noval
Diarrhea_10__29964	Noval
Diarrhea_10__30028	Noval
Diarrhea_10__30625	Noval
Diarrhea_10__30678	Noval
Diarrhea_10__31100	Noval
Diarrhea_10__3134	Noval
Diarrhea_10__31787	Noval
Diarrhea_10__32565	Noval
Diarrhea_10__3380	Noval
Diarrhea_10__34190	Noval
Diarrhea_10__35450	Noval
Diarrhea_10__35936	Noval
Diarrhea_10__36040	Noval
Diarrhea_10__36782	Noval
Diarrhea_10__37562	Noval
Diarrhea_10__3772	Noval
Diarrhea_10__37965	Noval
Diarrhea_10__38822	Noval
Diarrhea_10__3927	Noval
Diarrhea_10__40588	Noval
Diarrhea_10__40920	Noval
Diarrhea_10__4164	Noval
Diarrhea_10__41730	Noval
Diarrhea_10__41756	Noval
Diarrhea_10__42129	Noval
Diarrhea_10__42164	Noval
Diarrhea_10__42228	Noval
Diarrhea_10__42573	Noval
Diarrhea_10__4380	Noval
Diarrhea_10__4388	Noval
Diarrhea_10__45603	Noval
Diarrhea_10__46057	Noval
Diarrhea_10__46066	Noval
Diarrhea_10__46144	Noval
Diarrhea_10__46223	Noval
Diarrhea_10__46234	Noval
Diarrhea_10__46235	Noval
Diarrhea_10__46238	Noval
Diarrhea_10__5283	Noval
Diarrhea_10__5542	Noval
Diarrhea_10__5659	Noval
Diarrhea_10__6053	Noval
Diarrhea_10__7487	Noval
Diarrhea_10__7734	Noval
Diarrhea_10__779	Noval
Diarrhea_10__7814	Noval
Diarrhea_10__782	Noval
Diarrhea_10__8300	Noval
Diarrhea_10__8437	Noval
Diarrhea_10__8658	Noval
Diarrhea_10__9025	Noval
Diarrhea_10__9236	Noval
Diarrhea_10__9547	Noval
Diarrhea_10__9879	Noval
Diarrhea_11__100308	Noval
Diarrhea_11__100612	Noval
Diarrhea_11__100857	Noval
Diarrhea_11__100919	Noval
Diarrhea_11__101298	Noval
Diarrhea_11__101620	Noval
Diarrhea_11__101876	Noval
Diarrhea_11__10190	Noval
Diarrhea_11__102341	Noval
Diarrhea_11__102357	Noval
Diarrhea_11__102399	Noval
Diarrhea_11__102591	Noval
Diarrhea_11__102961	Noval
Diarrhea_11__102981	Noval
Diarrhea_11__103289	Noval
Diarrhea_11__103750	Noval
Diarrhea_11__103770	Noval
Diarrhea_11__104004	Noval
Diarrhea_11__105507	Noval
Diarrhea_11__106345	Noval
Diarrhea_11__107177	Noval
Diarrhea_11__10735	Noval
Diarrhea_11__107389	Noval
Diarrhea_11__107494	Noval
Diarrhea_11__1078	Noval
Diarrhea_11__107842	Noval
Diarrhea_11__108176	Noval
Diarrhea_11__108263	Noval
Diarrhea_11__108353	Noval
Diarrhea_11__109066	Noval
Diarrhea_11__109426	Noval
Diarrhea_11__109611	Noval
Diarrhea_11__1103	Noval
Diarrhea_11__110705	Noval
Diarrhea_11__110945	Noval
Diarrhea_11__111082	Noval
Diarrhea_11__111545	Noval
Diarrhea_11__111633	Noval
Diarrhea_11__111921	Noval
Diarrhea_11__112969	Noval
Diarrhea_11__113161	Noval
Diarrhea_11__113353	Noval
Diarrhea_11__113410	Noval
Diarrhea_11__11414	Noval
Diarrhea_11__114150	Noval
Diarrhea_11__114996	Noval
Diarrhea_11__11513	Noval
Diarrhea_11__11538	Noval
Diarrhea_11__11640	Noval
Diarrhea_11__12111	Noval
Diarrhea_11__12125	Noval
Diarrhea_11__12328	Noval
Diarrhea_11__1234	Noval
Diarrhea_11__12864	Noval
Diarrhea_11__12877	Noval
Diarrhea_11__13073	Noval
Diarrhea_11__13506	Noval
Diarrhea_11__13658	Noval
Diarrhea_11__1366	Noval
Diarrhea_11__14612	Noval
Diarrhea_11__14871	Noval
Diarrhea_11__14904	Noval
Diarrhea_11__1508	Noval
Diarrhea_11__15366	Noval
Diarrhea_11__15493	Noval
Diarrhea_11__15499	Noval
Diarrhea_11__15500	Noval
Diarrhea_11__15713	Noval
Diarrhea_11__16730	Noval
Diarrhea_11__16949	Noval
Diarrhea_11__17587	Noval
Diarrhea_11__17763	Noval
Diarrhea_11__17828	Noval
Diarrhea_11__19204	Noval
Diarrhea_11__19602	Noval
Diarrhea_11__19666	Noval
Diarrhea_11__20067	Noval
Diarrhea_11__2016	Noval
Diarrhea_11__20655	Noval
Diarrhea_11__20802	Noval
Diarrhea_11__21150	Noval
Diarrhea_11__21182	Noval
Diarrhea_11__21447	Noval
Diarrhea_11__2156	Noval
Diarrhea_11__21605	Noval
Diarrhea_11__21839	Noval
Diarrhea_11__21907	Noval
Diarrhea_11__22915	Noval
Diarrhea_11__2302	Noval
Diarrhea_11__23239	Noval
Diarrhea_11__23269	Noval
Diarrhea_11__23314	Noval
Diarrhea_11__23684	Noval
Diarrhea_11__23861	Noval
Diarrhea_11__24200	Noval
Diarrhea_11__24262	Noval
Diarrhea_11__24292	Noval
Diarrhea_11__24570	Noval
Diarrhea_11__24862	Noval
Diarrhea_11__24972	Noval
Diarrhea_11__25073	Noval
Diarrhea_11__25263	Noval
Diarrhea_11__25313	Noval
Diarrhea_11__25506	Noval
Diarrhea_11__25587	Noval
Diarrhea_11__25884	Noval
Diarrhea_11__26584	Noval
Diarrhea_11__26927	Noval
Diarrhea_11__26958	Noval
Diarrhea_11__27103	Noval
Diarrhea_11__27274	Noval
Diarrhea_11__27371	Noval
Diarrhea_11__27722	Noval
Diarrhea_11__28069	Noval
Diarrhea_11__28352	Noval
Diarrhea_11__28469	Noval
Diarrhea_11__28799	Noval
Diarrhea_11__29037	Noval
Diarrhea_11__29044	Noval
Diarrhea_11__29431	Noval
Diarrhea_11__29560	Noval
Diarrhea_11__29726	Noval
Diarrhea_11__29776	Noval
Diarrhea_11__3008	Noval
Diarrhea_11__30711	Noval
Diarrhea_11__30847	Noval
Diarrhea_11__31260	Noval
Diarrhea_11__31284	Noval
Diarrhea_11__31572	Noval
Diarrhea_11__31777	Noval
Diarrhea_11__32288	Noval
Diarrhea_11__32453	Noval
Diarrhea_11__32714	Noval
Diarrhea_11__32920	Noval
Diarrhea_11__32969	Noval
Diarrhea_11__33009	Noval
Diarrhea_11__33371	Noval
Diarrhea_11__3340	Noval
Diarrhea_11__33630	Noval
Diarrhea_11__3368	Noval
Diarrhea_11__33779	Noval
Diarrhea_11__34192	Noval
Diarrhea_11__34337	Noval
Diarrhea_11__34555	Noval
Diarrhea_11__35043	Noval
Diarrhea_11__3536	Noval
Diarrhea_11__36137	Noval
Diarrhea_11__36309	Noval
Diarrhea_11__36334	Noval
Diarrhea_11__36441	Noval
Diarrhea_11__36843	Noval
Diarrhea_11__37030	Noval
Diarrhea_11__37361	Noval
Diarrhea_11__37687	Noval
Diarrhea_11__37750	Noval
Diarrhea_11__38242	Noval
Diarrhea_11__38286	Noval
Diarrhea_11__38796	Noval
Diarrhea_11__39355	Noval
Diarrhea_11__3954	Noval
Diarrhea_11__40036	Noval
Diarrhea_11__40201	Noval
Diarrhea_11__40240	Noval
Diarrhea_11__40271	Noval
Diarrhea_11__4037	Noval
Diarrhea_11__4136	Noval
Diarrhea_11__41794	Noval
Diarrhea_11__41836	Noval
Diarrhea_11__4230	Noval
Diarrhea_11__4239	Noval
Diarrhea_11__42446	Noval
Diarrhea_11__42570	Noval
Diarrhea_11__43998	Noval
Diarrhea_11__44080	Noval
Diarrhea_11__44172	Noval
Diarrhea_11__44500	Noval
Diarrhea_11__44686	Noval
Diarrhea_11__45957	Noval
Diarrhea_11__46005	Noval
Diarrhea_11__46318	Noval
Diarrhea_11__46417	Noval
Diarrhea_11__46433	Noval
Diarrhea_11__46511	Noval
Diarrhea_11__47935	Noval
Diarrhea_11__48067	Noval
Diarrhea_11__48324	Noval
Diarrhea_11__48664	Noval
Diarrhea_11__48790	Noval
Diarrhea_11__4923	Noval
Diarrhea_11__49749	Noval
Diarrhea_11__49920	Noval
Diarrhea_11__50396	Noval
Diarrhea_11__51118	Noval
Diarrhea_11__51295	Noval
Diarrhea_11__51324	Noval
Diarrhea_11__51433	Noval
Diarrhea_11__51894	Noval
Diarrhea_11__52111	Noval
Diarrhea_11__52359	Noval
Diarrhea_11__52877	Noval
Diarrhea_11__52971	Noval
Diarrhea_11__53043	Noval
Diarrhea_11__53098	Noval
Diarrhea_11__5327	Noval
Diarrhea_11__53603	Noval
Diarrhea_11__53681	Noval
Diarrhea_11__54080	Noval
Diarrhea_11__54149	Noval
Diarrhea_11__54240	Noval
Diarrhea_11__54572	Noval
Diarrhea_11__54852	Noval
Diarrhea_11__54872	Noval
Diarrhea_11__55020	Noval
Diarrhea_11__55426	Noval
Diarrhea_11__55466	Noval
Diarrhea_11__55560	Noval
Diarrhea_11__55605	Noval
Diarrhea_11__5567	Noval
Diarrhea_11__56235	Noval
Diarrhea_11__56265	Noval
Diarrhea_11__56337	Noval
Diarrhea_11__56572	Noval
Diarrhea_11__56849	Noval
Diarrhea_11__57988	Noval
Diarrhea_11__58715	Noval
Diarrhea_11__58930	Noval
Diarrhea_11__592	Noval
Diarrhea_11__59754	Noval
Diarrhea_11__59882	Noval
Diarrhea_11__6036	Noval
Diarrhea_11__60719	Noval
Diarrhea_11__60776	Noval
Diarrhea_11__61135	Noval
Diarrhea_11__6122	Noval
Diarrhea_11__61366	Noval
Diarrhea_11__61414	Noval
Diarrhea_11__61517	Noval
Diarrhea_11__6210	Noval
Diarrhea_11__64048	Noval
Diarrhea_11__64368	Noval
Diarrhea_11__64455	Noval
Diarrhea_11__65085	Noval
Diarrhea_11__65428	Noval
Diarrhea_11__6548	Noval
Diarrhea_11__65858	Noval
Diarrhea_11__65896	Noval
Diarrhea_11__6623	Noval
Diarrhea_11__66400	Noval
Diarrhea_11__6700	Noval
Diarrhea_11__67059	Noval
Diarrhea_11__67357	Noval
Diarrhea_11__67575	Noval
Diarrhea_11__68198	Noval
Diarrhea_11__6844	Noval
Diarrhea_11__69230	Noval
Diarrhea_11__69310	Noval
Diarrhea_11__69839	Noval
Diarrhea_11__70059	Noval
Diarrhea_11__70468	Noval
Diarrhea_11__71185	Noval
Diarrhea_11__72625	Noval
Diarrhea_11__73987	Noval
Diarrhea_11__74131	Noval
Diarrhea_11__74295	Noval
Diarrhea_11__74501	Noval
Diarrhea_11__74955	Noval
Diarrhea_11__77431	Noval
Diarrhea_11__78121	Noval
Diarrhea_11__7858	Noval
Diarrhea_11__78700	Noval
Diarrhea_11__78782	Noval
Diarrhea_11__79139	Noval
Diarrhea_11__79470	Noval
Diarrhea_11__79660	Noval
Diarrhea_11__80152	Noval
Diarrhea_11__80219	Noval
Diarrhea_11__80465	Noval
Diarrhea_11__81157	Noval
Diarrhea_11__81715	Noval
Diarrhea_11__81898	Noval
Diarrhea_11__82091	Noval
Diarrhea_11__82486	Noval
Diarrhea_11__82899	Noval
Diarrhea_11__83550	Noval
Diarrhea_11__84213	Noval
Diarrhea_11__84406	Noval
Diarrhea_11__85068	Noval
Diarrhea_11__85427	Noval
Diarrhea_11__86039	Noval
Diarrhea_11__86218	Noval
Diarrhea_11__86334	Noval
Diarrhea_11__86571	Noval
Diarrhea_11__86620	Noval
Diarrhea_11__87741	Noval
Diarrhea_11__88391	Noval
Diarrhea_11__88490	Noval
Diarrhea_11__88874	Noval
Diarrhea_11__89039	Noval
Diarrhea_11__8931	Noval
Diarrhea_11__89356	Noval
Diarrhea_11__89793	Noval
Diarrhea_11__90624	Noval
Diarrhea_11__90671	Noval
Diarrhea_11__91296	Noval
Diarrhea_11__91401	Noval
Diarrhea_11__91444	Noval
Diarrhea_11__91938	Noval
Diarrhea_11__92090	Noval
Diarrhea_11__92331	Noval
Diarrhea_11__92347	Noval
Diarrhea_11__92845	Noval
Diarrhea_11__93554	Noval
Diarrhea_11__93772	Noval
Diarrhea_11__93950	Noval
[truncated: 10,299 more rows]
