# Supplementary material for: Metagenomic Sequencing Identified Specific Bacteriophage Signature Discriminating between Healthy and Diarrheal Neonatal Piglets
Source: Nutrients. 2023 Mar 27;15(7):1616. doi: 10.3390/nu15071616 (PMC10097093; doi:10.3390/nu15071616)
Supplement: Supplementary file 1 [file nutrients-15-01616-s001.zip › Supplementary file/Table S2.xlsx]

## Sheet: Table S2
Table S2: Predicted host genome and species number of identified viral genomes
vOTUID	HostGenomeNum	HostSpeciesNum
vOTU1	0	0
vOTU3	0	0
vOTU5	0	0
vOTU6	0	0
vOTU8	0	0
vOTU10	0	0
vOTU15	0	0
vOTU16	0	0
vOTU18	0	0
vOTU19	0	0
vOTU21	0	0
vOTU22	0	0
vOTU23	0	0
vOTU24	0	0
vOTU27	0	0
vOTU29	0	0
vOTU31	0	0
vOTU34	0	0
vOTU35	0	0
vOTU37	0	0
vOTU38	0	0
vOTU39	0	0
vOTU40	0	0
vOTU41	0	0
vOTU44	0	0
vOTU49	0	0
vOTU50	0	0
vOTU51	0	0
vOTU54	0	0
vOTU55	0	0
vOTU56	0	0
vOTU58	0	0
vOTU61	0	0
vOTU65	0	0
vOTU66	0	0
vOTU68	0	0
vOTU71	0	0
vOTU72	0	0
vOTU73	0	0
vOTU76	0	0
vOTU78	0	0
vOTU81	0	0
vOTU83	0	0
vOTU85	0	0
vOTU86	0	0
vOTU88	0	0
vOTU90	0	0
vOTU91	0	0
vOTU92	0	0
vOTU93	0	0
vOTU95	0	0
vOTU97	0	0
vOTU99	0	0
vOTU100	0	0
vOTU101	0	0
vOTU102	0	0
vOTU105	0	0
vOTU106	0	0
vOTU107	0	0
vOTU108	0	0
vOTU109	0	0
vOTU113	0	0
vOTU114	0	0
vOTU117	0	0
vOTU118	0	0
vOTU119	0	0
vOTU120	0	0
vOTU121	0	0
vOTU122	0	0
vOTU123	0	0
vOTU127	0	0
vOTU128	0	0
vOTU129	0	0
vOTU130	0	0
vOTU132	0	0
vOTU133	0	0
vOTU134	0	0
vOTU135	0	0
vOTU136	0	0
vOTU137	0	0
vOTU138	0	0
vOTU139	0	0
vOTU140	0	0
vOTU141	0	0
vOTU142	0	0
vOTU143	0	0
vOTU144	0	0
vOTU145	0	0
vOTU146	0	0
vOTU147	0	0
vOTU148	0	0
vOTU149	0	0
vOTU150	0	0
vOTU151	0	0
vOTU152	0	0
vOTU153	0	0
vOTU154	0	0
vOTU155	0	0
vOTU156	0	0
vOTU157	0	0
vOTU159	0	0
vOTU160	0	0
vOTU161	0	0
vOTU162	0	0
vOTU163	0	0
vOTU164	0	0
vOTU165	0	0
vOTU166	0	0
vOTU167	0	0
vOTU168	0	0
vOTU169	0	0
vOTU170	0	0
vOTU171	0	0
vOTU172	0	0
vOTU173	0	0
vOTU174	0	0
vOTU175	0	0
vOTU176	0	0
vOTU177	0	0
vOTU178	0	0
vOTU179	0	0
vOTU180	0	0
vOTU181	0	0
vOTU182	0	0
vOTU183	0	0
vOTU184	0	0
vOTU185	0	0
vOTU186	0	0
vOTU187	0	0
vOTU188	0	0
vOTU189	0	0
vOTU190	0	0
vOTU192	0	0
vOTU193	0	0
vOTU194	0	0
vOTU195	0	0
vOTU196	0	0
vOTU197	0	0
vOTU198	0	0
vOTU199	0	0
vOTU200	0	0
vOTU201	0	0
vOTU202	0	0
vOTU203	0	0
vOTU204	0	0
vOTU205	0	0
vOTU207	0	0
vOTU208	0	0
vOTU209	0	0
vOTU210	0	0
vOTU211	0	0
vOTU212	0	0
vOTU213	0	0
vOTU214	0	0
vOTU215	0	0
vOTU216	0	0
vOTU217	0	0
vOTU218	0	0
vOTU219	0	0
vOTU221	0	0
vOTU223	0	0
vOTU224	0	0
vOTU225	0	0
vOTU226	0	0
vOTU227	0	0
vOTU228	0	0
vOTU229	0	0
vOTU230	0	0
vOTU231	0	0
vOTU233	0	0
vOTU234	0	0
vOTU235	0	0
vOTU236	0	0
vOTU237	0	0
vOTU238	0	0
vOTU239	0	0
vOTU241	0	0
vOTU243	0	0
vOTU244	0	0
vOTU245	0	0
vOTU246	0	0
vOTU247	0	0
vOTU248	0	0
vOTU249	0	0
vOTU250	0	0
vOTU251	0	0
vOTU252	0	0
vOTU253	0	0
vOTU254	0	0
vOTU257	0	0
vOTU258	0	0
vOTU259	0	0
vOTU260	0	0
vOTU261	0	0
vOTU262	0	0
vOTU263	0	0
vOTU264	0	0
vOTU265	0	0
vOTU266	0	0
vOTU267	0	0
vOTU268	0	0
vOTU269	0	0
vOTU270	0	0
vOTU272	0	0
vOTU273	0	0
vOTU274	0	0
vOTU275	0	0
vOTU277	0	0
vOTU278	0	0
vOTU280	0	0
vOTU281	0	0
vOTU282	0	0
vOTU283	0	0
vOTU284	0	0
vOTU285	0	0
vOTU286	0	0
vOTU287	0	0
vOTU288	0	0
vOTU289	0	0
vOTU290	0	0
vOTU291	0	0
vOTU292	0	0
vOTU293	0	0
vOTU294	0	0
vOTU296	0	0
vOTU297	0	0
vOTU298	0	0
vOTU299	0	0
vOTU300	0	0
vOTU301	0	0
vOTU302	0	0
vOTU303	0	0
vOTU304	0	0
vOTU305	0	0
vOTU307	0	0
vOTU308	0	0
vOTU309	0	0
vOTU310	0	0
vOTU311	0	0
vOTU313	0	0
vOTU314	0	0
vOTU315	0	0
vOTU316	0	0
vOTU317	0	0
vOTU318	0	0
vOTU319	0	0
vOTU320	0	0
vOTU321	0	0
vOTU322	0	0
vOTU324	0	0
vOTU325	0	0
vOTU327	0	0
vOTU328	0	0
vOTU329	0	0
vOTU330	0	0
vOTU331	0	0
vOTU332	0	0
vOTU333	0	0
vOTU334	0	0
vOTU335	0	0
vOTU337	0	0
vOTU338	0	0
vOTU339	0	0
vOTU340	0	0
vOTU341	0	0
vOTU342	0	0
vOTU343	0	0
vOTU344	0	0
vOTU345	0	0
vOTU346	0	0
vOTU347	0	0
vOTU348	0	0
vOTU349	0	0
vOTU350	0	0
vOTU351	0	0
vOTU353	0	0
vOTU354	0	0
vOTU355	0	0
vOTU357	0	0
vOTU358	0	0
vOTU359	0	0
vOTU361	0	0
vOTU362	0	0
vOTU363	0	0
vOTU364	0	0
vOTU365	0	0
vOTU366	0	0
vOTU367	0	0
vOTU368	0	0
vOTU369	0	0
vOTU371	0	0
vOTU372	0	0
vOTU373	0	0
vOTU374	0	0
vOTU375	0	0
vOTU376	0	0
vOTU377	0	0
vOTU378	0	0
vOTU380	0	0
vOTU381	0	0
vOTU382	0	0
vOTU383	0	0
vOTU384	0	0
vOTU385	0	0
vOTU386	0	0
vOTU387	0	0
vOTU388	0	0
vOTU389	0	0
vOTU390	0	0
vOTU391	0	0
vOTU392	0	0
vOTU393	0	0
vOTU394	0	0
vOTU395	0	0
vOTU396	0	0
vOTU397	0	0
vOTU399	0	0
vOTU400	0	0
vOTU402	0	0
vOTU403	0	0
vOTU404	0	0
vOTU405	0	0
vOTU406	0	0
vOTU407	0	0
vOTU408	0	0
vOTU409	0	0
vOTU411	0	0
vOTU412	0	0
vOTU413	0	0
vOTU414	0	0
vOTU415	0	0
vOTU416	0	0
vOTU417	0	0
vOTU418	0	0
vOTU419	0	0
vOTU420	0	0
vOTU421	0	0
vOTU422	0	0
vOTU423	0	0
vOTU424	0	0
vOTU425	0	0
vOTU426	0	0
vOTU427	0	0
vOTU428	0	0
vOTU429	0	0
vOTU430	0	0
vOTU431	0	0
vOTU432	0	0
vOTU433	0	0
vOTU434	0	0
vOTU436	0	0
vOTU437	0	0
vOTU438	0	0
vOTU439	0	0
vOTU440	0	0
vOTU441	0	0
vOTU442	0	0
vOTU443	0	0
vOTU445	0	0
vOTU446	0	0
vOTU447	0	0
vOTU448	0	0
vOTU449	0	0
vOTU450	0	0
vOTU451	0	0
vOTU453	0	0
vOTU454	0	0
vOTU455	0	0
vOTU456	0	0
vOTU459	0	0
vOTU460	0	0
vOTU461	0	0
vOTU463	0	0
vOTU464	0	0
vOTU465	0	0
vOTU466	0	0
vOTU467	0	0
vOTU468	0	0
vOTU469	0	0
vOTU470	0	0
vOTU471	0	0
vOTU472	0	0
vOTU473	0	0
vOTU475	0	0
vOTU476	0	0
vOTU477	0	0
vOTU478	0	0
vOTU479	0	0
vOTU480	0	0
vOTU481	0	0
vOTU482	0	0
vOTU483	0	0
vOTU484	0	0
vOTU485	0	0
vOTU486	0	0
vOTU491	0	0
vOTU492	0	0
vOTU493	0	0
vOTU494	0	0
vOTU495	0	0
vOTU497	0	0
vOTU498	0	0
vOTU499	0	0
vOTU500	0	0
vOTU501	0	0
vOTU502	0	0
vOTU503	0	0
vOTU504	0	0
vOTU505	0	0
vOTU506	0	0
vOTU507	0	0
vOTU509	0	0
vOTU510	0	0
vOTU511	0	0
vOTU512	0	0
vOTU513	0	0
vOTU515	0	0
vOTU516	0	0
vOTU518	0	0
vOTU519	0	0
vOTU521	0	0
vOTU522	0	0
vOTU523	0	0
vOTU524	0	0
vOTU525	0	0
vOTU526	0	0
vOTU527	0	0
vOTU528	0	0
vOTU529	0	0
vOTU530	0	0
vOTU531	0	0
vOTU532	0	0
vOTU533	0	0
vOTU534	0	0
vOTU535	0	0
vOTU536	0	0
vOTU537	0	0
vOTU538	0	0
vOTU539	0	0
vOTU542	0	0
vOTU543	0	0
vOTU544	0	0
vOTU545	0	0
vOTU546	0	0
vOTU547	0	0
vOTU548	0	0
vOTU549	0	0
vOTU550	0	0
vOTU551	0	0
vOTU552	0	0
vOTU554	0	0
vOTU556	0	0
vOTU557	0	0
vOTU560	0	0
vOTU561	0	0
vOTU562	0	0
vOTU563	0	0
vOTU565	0	0
vOTU566	0	0
vOTU567	0	0
vOTU569	0	0
vOTU570	0	0
vOTU571	0	0
vOTU572	0	0
vOTU573	0	0
vOTU574	0	0
vOTU575	0	0
vOTU576	0	0
vOTU577	0	0
vOTU578	0	0
vOTU580	0	0
vOTU582	0	0
vOTU583	0	0
vOTU584	0	0
vOTU585	0	0
vOTU586	0	0
vOTU588	0	0
vOTU590	0	0
vOTU592	0	0
vOTU593	0	0
vOTU594	0	0
vOTU595	0	0
vOTU596	0	0
vOTU597	0	0
vOTU598	0	0
vOTU599	0	0
vOTU600	0	0
vOTU602	0	0
vOTU603	0	0
vOTU604	0	0
vOTU605	0	0
vOTU606	0	0
vOTU608	0	0
vOTU609	0	0
vOTU610	0	0
vOTU611	0	0
vOTU612	0	0
vOTU613	0	0
vOTU614	0	0
vOTU615	0	0
vOTU616	0	0
vOTU617	0	0
vOTU618	0	0
vOTU619	0	0
vOTU620	0	0
vOTU621	0	0
vOTU622	0	0
vOTU623	0	0
vOTU624	0	0
vOTU625	0	0
vOTU626	0	0
vOTU627	0	0
vOTU628	0	0
vOTU629	0	0
vOTU630	0	0
vOTU631	0	0
vOTU632	0	0
vOTU633	0	0
vOTU634	0	0
vOTU635	0	0
vOTU637	0	0
vOTU638	0	0
vOTU640	0	0
vOTU641	0	0
vOTU642	0	0
vOTU643	0	0
vOTU644	0	0
vOTU645	0	0
vOTU646	0	0
vOTU647	0	0
vOTU648	0	0
vOTU649	0	0
vOTU650	0	0
vOTU651	0	0
vOTU652	0	0
vOTU653	0	0
vOTU654	0	0
vOTU657	0	0
vOTU658	0	0
vOTU659	0	0
vOTU660	0	0
vOTU663	0	0
vOTU664	0	0
vOTU665	0	0
vOTU666	0	0
vOTU668	0	0
vOTU669	0	0
vOTU670	0	0
vOTU671	0	0
vOTU673	0	0
vOTU675	0	0
vOTU676	0	0
vOTU677	0	0
vOTU678	0	0
vOTU679	0	0
vOTU680	0	0
vOTU681	0	0
vOTU682	0	0
vOTU683	0	0
vOTU684	0	0
vOTU685	0	0
vOTU686	0	0
vOTU687	0	0
vOTU688	0	0
vOTU690	0	0
vOTU691	0	0
vOTU692	0	0
vOTU693	0	0
vOTU694	0	0
vOTU695	0	0
vOTU696	0	0
vOTU697	0	0
vOTU698	0	0
vOTU699	0	0
vOTU700	0	0
vOTU701	0	0
vOTU702	0	0
vOTU703	0	0
vOTU704	0	0
vOTU705	0	0
vOTU706	0	0
vOTU707	0	0
vOTU708	0	0
vOTU710	0	0
vOTU711	0	0
vOTU714	0	0
vOTU715	0	0
vOTU717	0	0
vOTU718	0	0
vOTU719	0	0
vOTU720	0	0
vOTU721	0	0
vOTU722	0	0
vOTU724	0	0
vOTU725	0	0
vOTU726	0	0
vOTU727	0	0
vOTU728	0	0
vOTU729	0	0
vOTU730	0	0
vOTU731	0	0
vOTU732	0	0
vOTU733	0	0
vOTU734	0	0
vOTU735	0	0
vOTU736	0	0
vOTU737	0	0
vOTU738	0	0
vOTU739	0	0
vOTU740	0	0
vOTU741	0	0
vOTU742	0	0
vOTU743	0	0
vOTU744	0	0
vOTU746	0	0
vOTU748	0	0
vOTU749	0	0
vOTU750	0	0
vOTU751	0	0
vOTU752	0	0
vOTU753	0	0
vOTU755	0	0
vOTU756	0	0
vOTU757	0	0
vOTU758	0	0
vOTU759	0	0
vOTU762	0	0
vOTU764	0	0
vOTU765	0	0
vOTU766	0	0
vOTU767	0	0
vOTU768	0	0
vOTU771	0	0
vOTU772	0	0
vOTU774	0	0
vOTU775	0	0
vOTU776	0	0
vOTU777	0	0
vOTU779	0	0
vOTU780	0	0
vOTU781	0	0
vOTU782	0	0
vOTU784	0	0
vOTU786	0	0
vOTU788	0	0
vOTU790	0	0
vOTU791	0	0
vOTU792	0	0
vOTU793	0	0
vOTU794	0	0
vOTU795	0	0
vOTU796	0	0
vOTU797	0	0
vOTU798	0	0
vOTU800	0	0
vOTU801	0	0
vOTU802	0	0
vOTU803	0	0
vOTU804	0	0
vOTU805	0	0
vOTU806	0	0
vOTU807	0	0
vOTU808	0	0
vOTU809	0	0
vOTU810	0	0
vOTU811	0	0
vOTU812	0	0
vOTU813	0	0
vOTU814	0	0
vOTU815	0	0
vOTU816	0	0
vOTU818	0	0
vOTU819	0	0
vOTU820	0	0
vOTU821	0	0
vOTU822	0	0
vOTU823	0	0
vOTU824	0	0
vOTU826	0	0
vOTU827	0	0
vOTU828	0	0
vOTU829	0	0
vOTU830	0	0
vOTU831	0	0
vOTU832	0	0
vOTU833	0	0
vOTU834	0	0
vOTU835	0	0
vOTU836	0	0
vOTU837	0	0
vOTU838	0	0
vOTU839	0	0
vOTU840	0	0
vOTU841	0	0
vOTU842	0	0
vOTU843	0	0
vOTU844	0	0
vOTU845	0	0
vOTU848	0	0
vOTU849	0	0
vOTU850	0	0
vOTU851	0	0
vOTU852	0	0
vOTU853	0	0
vOTU857	0	0
vOTU858	0	0
vOTU859	0	0
vOTU860	0	0
vOTU861	0	0
vOTU862	0	0
vOTU863	0	0
vOTU864	0	0
vOTU865	0	0
vOTU866	0	0
vOTU867	0	0
vOTU868	0	0
vOTU869	0	0
vOTU871	0	0
vOTU872	0	0
vOTU873	0	0
vOTU874	0	0
vOTU875	0	0
vOTU876	0	0
vOTU877	0	0
vOTU878	0	0
vOTU879	0	0
vOTU880	0	0
vOTU882	0	0
vOTU883	0	0
vOTU884	0	0
vOTU886	0	0
vOTU888	0	0
vOTU889	0	0
vOTU890	0	0
vOTU891	0	0
vOTU893	0	0
vOTU894	0	0
vOTU896	0	0
vOTU897	0	0
vOTU898	0	0
vOTU899	0	0
vOTU900	0	0
vOTU901	0	0
vOTU902	0	0
vOTU903	0	0
vOTU904	0	0
vOTU905	0	0
vOTU906	0	0
vOTU907	0	0
vOTU908	0	0
vOTU909	0	0
vOTU910	0	0
vOTU912	0	0
vOTU913	0	0
vOTU914	0	0
vOTU915	0	0
vOTU916	0	0
vOTU917	0	0
vOTU918	0	0
vOTU920	0	0
vOTU921	0	0
vOTU922	0	0
vOTU923	0	0
vOTU924	0	0
vOTU925	0	0
vOTU926	0	0
vOTU928	0	0
vOTU931	0	0
vOTU932	0	0
vOTU933	0	0
vOTU934	0	0
vOTU935	0	0
vOTU936	0	0
vOTU937	0	0
vOTU938	0	0
vOTU939	0	0
vOTU940	0	0
vOTU941	0	0
vOTU942	0	0
vOTU943	0	0
vOTU944	0	0
vOTU945	0	0
vOTU947	0	0
vOTU949	0	0
vOTU950	0	0
vOTU951	0	0
vOTU952	0	0
vOTU953	0	0
vOTU954	0	0
vOTU955	0	0
vOTU956	0	0
vOTU957	0	0
vOTU958	0	0
vOTU960	0	0
vOTU961	0	0
vOTU963	0	0
vOTU964	0	0
vOTU965	0	0
vOTU967	0	0
vOTU968	0	0
vOTU969	0	0
vOTU970	0	0
vOTU971	0	0
vOTU972	0	0
vOTU973	0	0
vOTU974	0	0
vOTU975	0	0
vOTU976	0	0
vOTU977	0	0
vOTU978	0	0
vOTU979	0	0
vOTU980	0	0
vOTU981	0	0
vOTU982	0	0
vOTU983	0	0
vOTU986	0	0
vOTU987	0	0
vOTU988	0	0
vOTU989	0	0
vOTU990	0	0
vOTU991	0	0
vOTU992	0	0
vOTU993	0	0
vOTU994	0	0
vOTU995	0	0
vOTU997	0	0
vOTU999	0	0
vOTU1000	0	0
vOTU1001	0	0
vOTU1002	0	0
vOTU1003	0	0
vOTU1004	0	0
vOTU1005	0	0
vOTU1006	0	0
vOTU1007	0	0
vOTU1008	0	0
vOTU1009	0	0
vOTU1010	0	0
vOTU1011	0	0
vOTU1013	0	0
vOTU1014	0	0
vOTU1015	0	0
vOTU1016	0	0
vOTU1017	0	0
vOTU1018	0	0
vOTU1019	0	0
vOTU1020	0	0
vOTU1021	0	0
vOTU1022	0	0
vOTU1023	0	0
vOTU1024	0	0
vOTU1025	0	0
vOTU1026	0	0
vOTU1027	0	0
vOTU1029	0	0
vOTU1031	0	0
vOTU1032	0	0
vOTU1033	0	0
vOTU1034	0	0
vOTU1035	0	0
vOTU1037	0	0
vOTU1038	0	0
vOTU1040	0	0
vOTU1043	0	0
vOTU1044	0	0
vOTU1045	0	0
vOTU1046	0	0
vOTU1048	0	0
vOTU1050	0	0
vOTU1051	0	0
vOTU1052	0	0
vOTU1053	0	0
vOTU1054	0	0
vOTU1056	0	0
vOTU1058	0	0
vOTU1059	0	0
vOTU1060	0	0
vOTU1061	0	0
vOTU1062	0	0
vOTU1063	0	0
vOTU1064	0	0
vOTU1066	0	0
vOTU1067	0	0
vOTU1070	0	0
vOTU1071	0	0
vOTU1073	0	0
vOTU1074	0	0
vOTU1076	0	0
vOTU1077	0	0
vOTU1078	0	0
vOTU1079	0	0
vOTU1081	0	0
vOTU1082	0	0
vOTU1085	0	0
vOTU1086	0	0
vOTU1087	0	0
vOTU1088	0	0
vOTU1090	0	0
vOTU1091	0	0
vOTU1093	0	0
vOTU1094	0	0
vOTU1095	0	0
vOTU1096	0	0
vOTU1098	0	0
vOTU1099	0	0
vOTU1103	0	0
vOTU1104	0	0
vOTU1105	0	0
vOTU1106	0	0
vOTU1107	0	0
vOTU1108	0	0
vOTU1109	0	0
vOTU1110	0	0
vOTU1111	0	0
vOTU1112	0	0
vOTU1113	0	0
vOTU1114	0	0
vOTU1115	0	0
vOTU1117	0	0
vOTU1118	0	0
vOTU1119	0	0
vOTU1120	0	0
vOTU1121	0	0
vOTU1123	0	0
vOTU1124	0	0
vOTU1125	0	0
vOTU1126	0	0
vOTU1128	0	0
vOTU1129	0	0
vOTU1130	0	0
vOTU1131	0	0
vOTU1132	0	0
vOTU1133	0	0
vOTU1134	0	0
vOTU1135	0	0
vOTU1136	0	0
vOTU1137	0	0
vOTU1139	0	0
vOTU1140	0	0
vOTU1141	0	0
vOTU1142	0	0
vOTU1143	0	0
vOTU1144	0	0
vOTU1145	0	0
vOTU1146	0	0
vOTU1147	0	0
vOTU1148	0	0
vOTU1149	0	0
vOTU1152	0	0
vOTU1153	0	0
vOTU1154	0	0
vOTU1155	0	0
vOTU1156	0	0
vOTU1157	0	0
vOTU1158	0	0
vOTU1160	0	0
vOTU1161	0	0
vOTU1162	0	0
vOTU1163	0	0
vOTU1164	0	0
vOTU1165	0	0
vOTU1166	0	0
vOTU1167	0	0
vOTU1168	0	0
vOTU1169	0	0
vOTU1170	0	0
vOTU1172	0	0
vOTU1174	0	0
vOTU1175	0	0
vOTU1176	0	0
vOTU1177	0	0
vOTU1178	0	0
vOTU1179	0	0
vOTU1180	0	0
vOTU1181	0	0
vOTU1182	0	0
vOTU1183	0	0
vOTU1184	0	0
vOTU1185	0	0
vOTU1186	0	0
vOTU1187	0	0
vOTU1188	0	0
vOTU1189	0	0
vOTU1190	0	0
vOTU1192	0	0
vOTU1193	0	0
vOTU1194	0	0
vOTU1195	0	0
vOTU1196	0	0
vOTU1197	0	0
vOTU1198	0	0
vOTU1199	0	0
vOTU1200	0	0
vOTU1201	0	0
vOTU1202	0	0
vOTU1203	0	0
vOTU1204	0	0
vOTU1206	0	0
vOTU1208	0	0
vOTU1209	0	0
vOTU1210	0	0
vOTU1211	0	0
vOTU1212	0	0
vOTU1213	0	0
vOTU1214	0	0
vOTU1216	0	0
vOTU1217	0	0
vOTU1219	0	0
vOTU1221	0	0
vOTU1222	0	0
vOTU1223	0	0
vOTU1224	0	0
vOTU1226	0	0
vOTU1227	0	0
vOTU1228	0	0
vOTU1229	0	0
vOTU1231	0	0
vOTU1232	0	0
vOTU1234	0	0
vOTU1235	0	0
vOTU1237	0	0
vOTU1238	0	0
vOTU1239	0	0
vOTU1240	0	0
vOTU1241	0	0
vOTU1242	0	0
vOTU1243	0	0
vOTU1244	0	0
vOTU1245	0	0
vOTU1246	0	0
vOTU1247	0	0
vOTU1248	0	0
vOTU1249	0	0
vOTU1250	0	0
vOTU1251	0	0
vOTU1253	0	0
vOTU1254	0	0
vOTU1256	0	0
vOTU1257	0	0
vOTU1258	0	0
vOTU1260	0	0
vOTU1261	0	0
vOTU1262	0	0
vOTU1265	0	0
vOTU1266	0	0
vOTU1267	0	0
vOTU1268	0	0
vOTU1269	0	0
vOTU1270	0	0
vOTU1271	0	0
vOTU1272	0	0
vOTU1273	0	0
vOTU1274	0	0
vOTU1275	0	0
vOTU1276	0	0
vOTU1277	0	0
vOTU1278	0	0
vOTU1279	0	0
vOTU1280	0	0
vOTU1281	0	0
vOTU1284	0	0
vOTU1285	0	0
vOTU1287	0	0
vOTU1288	0	0
vOTU1289	0	0
vOTU1290	0	0
vOTU1291	0	0
vOTU1294	0	0
vOTU1295	0	0
vOTU1296	0	0
vOTU1297	0	0
vOTU1298	0	0
vOTU1299	0	0
vOTU1301	0	0
vOTU1302	0	0
vOTU1303	0	0
vOTU1304	0	0
vOTU1305	0	0
vOTU1307	0	0
vOTU1309	0	0
vOTU1310	0	0
vOTU1311	0	0
vOTU1312	0	0
vOTU1314	0	0
vOTU1315	0	0
vOTU1316	0	0
vOTU1317	0	0
vOTU1318	0	0
vOTU1319	0	0
vOTU1320	0	0
vOTU1321	0	0
vOTU1322	0	0
vOTU1323	0	0
vOTU1324	0	0
vOTU1325	0	0
vOTU1326	0	0
vOTU1327	0	0
vOTU1330	0	0
vOTU1331	0	0
vOTU1332	0	0
vOTU1333	0	0
vOTU1335	0	0
vOTU1336	0	0
vOTU1337	0	0
vOTU1338	0	0
vOTU1339	0	0
vOTU1340	0	0
vOTU1341	0	0
vOTU1342	0	0
vOTU1343	0	0
vOTU1345	0	0
vOTU1347	0	0
vOTU1348	0	0
vOTU1349	0	0
vOTU1350	0	0
vOTU1351	0	0
vOTU1355	0	0
vOTU1357	0	0
vOTU1358	0	0
vOTU1359	0	0
vOTU1360	0	0
vOTU1361	0	0
vOTU1363	0	0
vOTU1364	0	0
vOTU1366	0	0
vOTU1367	0	0
vOTU1368	0	0
vOTU1369	0	0
vOTU1370	0	0
vOTU1372	0	0
vOTU1373	0	0
vOTU1374	0	0
vOTU1375	0	0
vOTU1377	0	0
vOTU1378	0	0
vOTU1380	0	0
vOTU1381	0	0
vOTU1384	0	0
vOTU1386	0	0
vOTU1387	0	0
vOTU1388	0	0
vOTU1389	0	0
vOTU1393	0	0
vOTU1395	0	0
vOTU1396	0	0
vOTU1397	0	0
vOTU1399	0	0
vOTU1400	0	0
vOTU1401	0	0
vOTU1402	0	0
vOTU1403	0	0
vOTU1404	0	0
vOTU1405	0	0
vOTU1406	0	0
vOTU1408	0	0
vOTU1409	0	0
vOTU1410	0	0
vOTU1411	0	0
vOTU1412	0	0
vOTU1413	0	0
vOTU1415	0	0
vOTU1416	0	0
vOTU1418	0	0
vOTU1419	0	0
vOTU1420	0	0
vOTU1421	0	0
vOTU1422	0	0
vOTU1423	0	0
vOTU1424	0	0
vOTU1425	0	0
vOTU1428	0	0
vOTU1429	0	0
vOTU1430	0	0
vOTU1431	0	0
vOTU1433	0	0
vOTU1435	0	0
vOTU1437	0	0
vOTU1438	0	0
vOTU1440	0	0
vOTU1441	0	0
vOTU1442	0	0
vOTU1443	0	0
vOTU1444	0	0
vOTU1445	0	0
vOTU1446	0	0
vOTU1447	0	0
vOTU1448	0	0
vOTU1449	0	0
vOTU1450	0	0
vOTU1451	0	0
vOTU1452	0	0
vOTU1453	0	0
vOTU1454	0	0
vOTU1456	0	0
vOTU1457	0	0
vOTU1458	0	0
vOTU1459	0	0
vOTU1460	0	0
vOTU1461	0	0
vOTU1462	0	0
vOTU1463	0	0
vOTU1464	0	0
vOTU1465	0	0
vOTU1466	0	0
vOTU1467	0	0
vOTU1468	0	0
vOTU1470	0	0
vOTU1471	0	0
vOTU1472	0	0
vOTU1473	0	0
vOTU1474	0	0
vOTU1475	0	0
vOTU1476	0	0
vOTU1477	0	0
vOTU1478	0	0
vOTU1479	0	0
vOTU1480	0	0
vOTU1481	0	0
vOTU1483	0	0
vOTU1486	0	0
vOTU1487	0	0
vOTU1488	0	0
vOTU1489	0	0
vOTU1490	0	0
vOTU1491	0	0
vOTU1492	0	0
vOTU1493	0	0
vOTU1494	0	0
vOTU1495	0	0
vOTU1496	0	0
vOTU1497	0	0
vOTU1498	0	0
vOTU1499	0	0
vOTU1500	0	0
vOTU1501	0	0
vOTU1502	0	0
vOTU1503	0	0
vOTU1504	0	0
vOTU1505	0	0
vOTU1506	0	0
vOTU1508	0	0
vOTU1509	0	0
vOTU1510	0	0
vOTU1511	0	0
vOTU1512	0	0
vOTU1513	0	0
vOTU1514	0	0
vOTU1515	0	0
vOTU1516	0	0
vOTU1517	0	0
vOTU1518	0	0
vOTU1519	0	0
vOTU1520	0	0
vOTU1521	0	0
vOTU1522	0	0
vOTU1523	0	0
vOTU1524	0	0
vOTU1525	0	0
vOTU1526	0	0
vOTU1527	0	0
vOTU1528	0	0
vOTU1529	0	0
vOTU1530	0	0
vOTU1531	0	0
vOTU1534	0	0
vOTU1535	0	0
vOTU1536	0	0
vOTU1537	0	0
vOTU1538	0	0
vOTU1539	0	0
vOTU1540	0	0
vOTU1541	0	0
vOTU1542	0	0
vOTU1543	0	0
vOTU1544	0	0
vOTU1545	0	0
vOTU1546	0	0
vOTU1547	0	0
vOTU1548	0	0
vOTU1549	0	0
vOTU1550	0	0
vOTU1551	0	0
vOTU1552	0	0
vOTU1553	0	0
vOTU1554	0	0
vOTU1555	0	0
vOTU1556	0	0
vOTU1557	0	0
vOTU1558	0	0
vOTU1559	0	0
vOTU1560	0	0
vOTU1561	0	0
vOTU1562	0	0
vOTU1563	0	0
vOTU1565	0	0
vOTU1566	0	0
vOTU1568	0	0
vOTU1569	0	0
vOTU1570	0	0
vOTU1571	0	0
vOTU1572	0	0
vOTU1573	0	0
vOTU1574	0	0
vOTU1575	0	0
vOTU1576	0	0
vOTU1577	0	0
vOTU1579	0	0
vOTU1580	0	0
vOTU1581	0	0
vOTU1582	0	0
vOTU1583	0	0
vOTU1584	0	0
vOTU1585	0	0
vOTU1586	0	0
vOTU1587	0	0
vOTU1588	0	0
vOTU1589	0	0
vOTU1591	0	0
vOTU1593	0	0
vOTU1594	0	0
vOTU1595	0	0
vOTU1597	0	0
vOTU1598	0	0
vOTU1599	0	0
vOTU1600	0	0
vOTU1601	0	0
vOTU1602	0	0
vOTU1604	0	0
vOTU1605	0	0
vOTU1606	0	0
vOTU1607	0	0
vOTU1608	0	0
vOTU1610	0	0
vOTU1611	0	0
vOTU1612	0	0
vOTU1613	0	0
vOTU1614	0	0
vOTU1615	0	0
vOTU1616	0	0
vOTU1617	0	0
vOTU1618	0	0
vOTU1619	0	0
vOTU1621	0	0
vOTU1622	0	0
vOTU1623	0	0
vOTU1624	0	0
vOTU1625	0	0
vOTU1626	0	0
vOTU1627	0	0
vOTU1628	0	0
vOTU1629	0	0
vOTU1632	0	0
vOTU1633	0	0
vOTU1634	0	0
vOTU1635	0	0
vOTU1636	0	0
vOTU1637	0	0
vOTU1638	0	0
vOTU1639	0	0
vOTU1640	0	0
vOTU1641	0	0
vOTU1643	0	0
vOTU1644	0	0
vOTU1645	0	0
vOTU1646	0	0
vOTU1647	0	0
vOTU1648	0	0
vOTU1649	0	0
vOTU1651	0	0
vOTU1652	0	0
vOTU1653	0	0
vOTU1654	0	0
vOTU1655	0	0
vOTU1656	0	0
vOTU1657	0	0
vOTU1658	0	0
vOTU1659	0	0
vOTU1660	0	0
vOTU1661	0	0
vOTU1662	0	0
vOTU1664	0	0
vOTU1666	0	0
vOTU1667	0	0
vOTU1668	0	0
vOTU1670	0	0
vOTU1671	0	0
vOTU1672	0	0
vOTU1673	0	0
vOTU1674	0	0
vOTU1675	0	0
vOTU1676	0	0
vOTU1677	0	0
vOTU1678	0	0
vOTU1679	0	0
vOTU1680	0	0
vOTU1681	0	0
vOTU1682	0	0
vOTU1685	0	0
vOTU1686	0	0
vOTU1687	0	0
vOTU1688	0	0
vOTU1689	0	0
vOTU1690	0	0
vOTU1691	0	0
vOTU1692	0	0
vOTU1693	0	0
vOTU1694	0	0
vOTU1695	0	0
vOTU1696	0	0
vOTU1697	0	0
vOTU1698	0	0
vOTU1699	0	0
vOTU1700	0	0
vOTU1701	0	0
vOTU1702	0	0
vOTU1703	0	0
vOTU1704	0	0
vOTU1705	0	0
vOTU1706	0	0
vOTU1707	0	0
vOTU1708	0	0
vOTU1710	0	0
vOTU1711	0	0
vOTU1712	0	0
vOTU1714	0	0
vOTU1715	0	0
vOTU1716	0	0
vOTU1717	0	0
vOTU1718	0	0
vOTU1719	0	0
vOTU1720	0	0
vOTU1721	0	0
vOTU1722	0	0
vOTU1723	0	0
vOTU1724	0	0
vOTU1725	0	0
vOTU1726	0	0
vOTU1727	0	0
vOTU1728	0	0
vOTU1729	0	0
vOTU1730	0	0
vOTU1731	0	0
vOTU1732	0	0
vOTU1733	0	0
vOTU1734	0	0
vOTU1735	0	0
vOTU1736	0	0
vOTU1737	0	0
vOTU1738	0	0
vOTU1739	0	0
vOTU1740	0	0
vOTU1741	0	0
vOTU1742	0	0
vOTU1743	0	0
vOTU1745	0	0
vOTU1746	0	0
vOTU1747	0	0
vOTU1748	0	0
vOTU1749	0	0
vOTU1750	0	0
vOTU1751	0	0
vOTU1752	0	0
vOTU1753	0	0
vOTU1754	0	0
vOTU1755	0	0
vOTU1756	0	0
vOTU1758	0	0
vOTU1760	0	0
vOTU1761	0	0
vOTU1762	0	0
vOTU1764	0	0
vOTU1765	0	0
vOTU1766	0	0
vOTU1767	0	0
vOTU1768	0	0
vOTU1769	0	0
vOTU1770	0	0
vOTU1771	0	0
vOTU1772	0	0
vOTU1773	0	0
vOTU1774	0	0
vOTU1775	0	0
vOTU1776	0	0
vOTU1777	0	0
vOTU1778	0	0
vOTU1779	0	0
vOTU1780	0	0
vOTU1781	0	0
vOTU1782	0	0
vOTU1783	0	0
vOTU1784	0	0
vOTU1785	0	0
vOTU1786	0	0
vOTU1787	0	0
vOTU1789	0	0
vOTU1790	0	0
vOTU1791	0	0
vOTU1792	0	0
vOTU1793	0	0
vOTU1794	0	0
vOTU1795	0	0
vOTU1796	0	0
vOTU1797	0	0
vOTU1798	0	0
vOTU1799	0	0
vOTU1800	0	0
vOTU1801	0	0
vOTU1802	0	0
vOTU1803	0	0
vOTU1804	0	0
vOTU1805	0	0
vOTU1806	0	0
vOTU1807	0	0
vOTU1808	0	0
vOTU1809	0	0
vOTU1810	0	0
vOTU1811	0	0
vOTU1812	0	0
vOTU1813	0	0
vOTU1814	0	0
vOTU1815	0	0
vOTU1816	0	0
vOTU1817	0	0
vOTU1818	0	0
vOTU1820	0	0
vOTU1821	0	0
vOTU1822	0	0
vOTU1823	0	0
vOTU1825	0	0
vOTU1826	0	0
vOTU1827	0	0
vOTU1828	0	0
vOTU1829	0	0
vOTU1830	0	0
vOTU1831	0	0
vOTU1832	0	0
vOTU1834	0	0
vOTU1835	0	0
vOTU1836	0	0
vOTU1837	0	0
vOTU1838	0	0
vOTU1839	0	0
vOTU1840	0	0
vOTU1841	0	0
vOTU1842	0	0
vOTU1843	0	0
vOTU1844	0	0
vOTU1845	0	0
vOTU1846	0	0
vOTU1847	0	0
vOTU1849	0	0
vOTU1851	0	0
vOTU1852	0	0
vOTU1853	0	0
vOTU1856	0	0
vOTU1857	0	0
vOTU1858	0	0
vOTU1859	0	0
vOTU1860	0	0
vOTU1861	0	0
vOTU1862	0	0
vOTU1864	0	0
vOTU1865	0	0
vOTU1866	0	0
vOTU1867	0	0
vOTU1869	0	0
vOTU1870	0	0
vOTU1871	0	0
vOTU1872	0	0
vOTU1873	0	0
vOTU1874	0	0
vOTU1875	0	0
vOTU1876	0	0
vOTU1877	0	0
vOTU1878	0	0
vOTU1880	0	0
vOTU1881	0	0
vOTU1882	0	0
vOTU1883	0	0
vOTU1884	0	0
vOTU1885	0	0
vOTU1886	0	0
vOTU1887	0	0
vOTU1888	0	0
vOTU1889	0	0
vOTU1890	0	0
vOTU1891	0	0
vOTU1892	0	0
vOTU1893	0	0
vOTU1894	0	0
vOTU1895	0	0
vOTU1896	0	0
vOTU1897	0	0
vOTU1898	0	0
vOTU1899	0	0
vOTU1900	0	0
vOTU1901	0	0
vOTU1904	0	0
vOTU1905	0	0
vOTU1907	0	0
vOTU1908	0	0
vOTU1909	0	0
vOTU1910	0	0
vOTU1911	0	0
vOTU1912	0	0
vOTU1914	0	0
vOTU1915	0	0
vOTU1916	0	0
vOTU1917	0	0
vOTU1918	0	0
vOTU1919	0	0
vOTU1920	0	0
vOTU1921	0	0
vOTU1923	0	0
vOTU1924	0	0
vOTU1925	0	0
vOTU1927	0	0
vOTU1928	0	0
vOTU1929	0	0
vOTU1930	0	0
vOTU1931	0	0
vOTU1932	0	0
vOTU1933	0	0
vOTU1934	0	0
vOTU1935	0	0
vOTU1937	0	0
vOTU1938	0	0
vOTU1939	0	0
vOTU1940	0	0
vOTU1941	0	0
vOTU1945	0	0
vOTU1946	0	0
vOTU1948	0	0
vOTU1949	0	0
vOTU1950	0	0
vOTU1951	0	0
vOTU1952	0	0
vOTU1953	0	0
vOTU1954	0	0
vOTU1955	0	0
vOTU1956	0	0
vOTU1957	0	0
vOTU1958	0	0
vOTU1959	0	0
vOTU1960	0	0
vOTU1961	0	0
vOTU1962	0	0
vOTU1963	0	0
vOTU1964	0	0
vOTU1965	0	0
vOTU1967	0	0
vOTU1968	0	0
vOTU1970	0	0
vOTU1971	0	0
vOTU1972	0	0
vOTU1973	0	0
vOTU1974	0	0
vOTU1975	0	0
vOTU1976	0	0
vOTU1977	0	0
vOTU1978	0	0
vOTU1979	0	0
vOTU1980	0	0
vOTU1981	0	0
vOTU1982	0	0
vOTU1985	0	0
vOTU1986	0	0
vOTU1987	0	0
vOTU1988	0	0
vOTU1989	0	0
vOTU1990	0	0
vOTU1991	0	0
vOTU1992	0	0
vOTU1994	0	0
vOTU1995	0	0
vOTU1996	0	0
vOTU1997	0	0
vOTU1999	0	0
vOTU2001	0	0
vOTU2002	0	0
vOTU2003	0	0
vOTU2004	0	0
vOTU2005	0	0
vOTU2006	0	0
vOTU2007	0	0
vOTU2008	0	0
vOTU2009	0	0
vOTU2011	0	0
vOTU2012	0	0
vOTU2013	0	0
vOTU2014	0	0
vOTU2015	0	0
vOTU2016	0	0
vOTU2017	0	0
vOTU2019	0	0
vOTU2020	0	0
vOTU2021	0	0
vOTU2022	0	0
vOTU2023	0	0
vOTU2024	0	0
vOTU2025	0	0
vOTU2026	0	0
vOTU2027	0	0
vOTU2028	0	0
vOTU2029	0	0
vOTU2030	0	0
vOTU2031	0	0
vOTU2032	0	0
vOTU2033	0	0
vOTU2034	0	0
vOTU2035	0	0
vOTU2036	0	0
vOTU2038	0	0
vOTU2039	0	0
vOTU2040	0	0
vOTU2041	0	0
vOTU2042	0	0
vOTU2043	0	0
vOTU2044	0	0
vOTU2045	0	0
vOTU2046	0	0
vOTU2047	0	0
vOTU2049	0	0
vOTU2050	0	0
vOTU2051	0	0
vOTU2053	0	0
vOTU2054	0	0
vOTU2055	0	0
vOTU2059	0	0
vOTU2060	0	0
vOTU2061	0	0
vOTU2062	0	0
vOTU2063	0	0
vOTU2064	0	0
vOTU2065	0	0
vOTU2066	0	0
vOTU2067	0	0
vOTU2068	0	0
vOTU2069	0	0
vOTU2070	0	0
vOTU2071	0	0
vOTU2072	0	0
vOTU2073	0	0
vOTU2074	0	0
vOTU2076	0	0
vOTU2077	0	0
vOTU2078	0	0
vOTU2079	0	0
vOTU2080	0	0
vOTU2081	0	0
vOTU2082	0	0
vOTU2083	0	0
vOTU2084	0	0
vOTU2085	0	0
vOTU2086	0	0
vOTU2087	0	0
vOTU2088	0	0
vOTU2089	0	0
vOTU2090	0	0
vOTU2092	0	0
vOTU2096	0	0
vOTU2097	0	0
vOTU2098	0	0
vOTU2099	0	0
vOTU2101	0	0
vOTU2102	0	0
vOTU2103	0	0
vOTU2104	0	0
vOTU2105	0	0
vOTU2106	0	0
vOTU2107	0	0
vOTU2108	0	0
vOTU2109	0	0
vOTU2110	0	0
vOTU2111	0	0
vOTU2112	0	0
vOTU2113	0	0
vOTU2114	0	0
vOTU2115	0	0
vOTU2116	0	0
vOTU2118	0	0
vOTU2119	0	0
vOTU2120	0	0
vOTU2121	0	0
vOTU2122	0	0
vOTU2123	0	0
vOTU2124	0	0
vOTU2125	0	0
vOTU2126	0	0
vOTU2128	0	0
vOTU2129	0	0
vOTU2130	0	0
vOTU2131	0	0
vOTU2132	0	0
vOTU2133	0	0
vOTU2134	0	0
vOTU2135	0	0
vOTU2136	0	0
vOTU2137	0	0
vOTU2138	0	0
vOTU2139	0	0
vOTU2141	0	0
vOTU2142	0	0
vOTU2143	0	0
vOTU2144	0	0
vOTU2145	0	0
vOTU2146	0	0
vOTU2147	0	0
vOTU2148	0	0
vOTU2149	0	0
vOTU2150	0	0
vOTU2151	0	0
vOTU2152	0	0
vOTU2153	0	0
vOTU2154	0	0
vOTU2155	0	0
vOTU2156	0	0
vOTU2157	0	0
vOTU2158	0	0
vOTU2161	0	0
vOTU2162	0	0
vOTU2163	0	0
vOTU2164	0	0
vOTU2165	0	0
vOTU2166	0	0
vOTU2167	0	0
vOTU2168	0	0
vOTU2169	0	0
vOTU2170	0	0
vOTU2171	0	0
vOTU2172	0	0
vOTU2173	0	0
vOTU2174	0	0
vOTU2175	0	0
vOTU2176	0	0
vOTU2177	0	0
vOTU2178	0	0
vOTU2179	0	0
vOTU2180	0	0
vOTU2181	0	0
vOTU2182	0	0
vOTU2183	0	0
vOTU2184	0	0
vOTU2185	0	0
vOTU2189	0	0
vOTU2190	0	0
vOTU2191	0	0
vOTU2192	0	0
vOTU2194	0	0
vOTU2196	0	0
vOTU2197	0	0
vOTU2198	0	0
vOTU2199	0	0
vOTU2200	0	0
vOTU2201	0	0
vOTU2202	0	0
vOTU2203	0	0
vOTU2204	0	0
vOTU2205	0	0
vOTU2206	0	0
vOTU2207	0	0
vOTU2208	0	0
vOTU2209	0	0
vOTU2210	0	0
vOTU2211	0	0
vOTU2212	0	0
vOTU2213	0	0
vOTU2214	0	0
vOTU2216	0	0
vOTU2217	0	0
vOTU2218	0	0
vOTU2219	0	0
vOTU2221	0	0
vOTU2225	0	0
vOTU2226	0	0
vOTU2227	0	0
vOTU2228	0	0
vOTU2229	0	0
vOTU2231	0	0
vOTU2232	0	0
vOTU2233	0	0
vOTU2234	0	0
vOTU2235	0	0
vOTU2236	0	0
vOTU2237	0	0
vOTU2238	0	0
vOTU2239	0	0
vOTU2240	0	0
vOTU2241	0	0
vOTU2242	0	0
vOTU2243	0	0
vOTU2244	0	0
vOTU2245	0	0
vOTU2247	0	0
vOTU2248	0	0
vOTU2250	0	0
vOTU2253	0	0
vOTU2254	0	0
vOTU2255	0	0
vOTU2256	0	0
vOTU2257	0	0
vOTU2258	0	0
vOTU2259	0	0
vOTU2260	0	0
vOTU2262	0	0
vOTU2263	0	0
vOTU2264	0	0
vOTU2265	0	0
vOTU2266	0	0
vOTU2267	0	0
vOTU2268	0	0
vOTU2271	0	0
vOTU2272	0	0
vOTU2273	0	0
vOTU2274	0	0
vOTU2275	0	0
vOTU2276	0	0
vOTU2277	0	0
vOTU2278	0	0
vOTU2280	0	0
vOTU2283	0	0
vOTU2284	0	0
vOTU2285	0	0
vOTU2286	0	0
vOTU2287	0	0
vOTU2288	0	0
vOTU2289	0	0
vOTU2292	0	0
vOTU2293	0	0
vOTU2294	0	0
vOTU2295	0	0
vOTU2296	0	0
vOTU2297	0	0
vOTU2298	0	0
vOTU2301	0	0
vOTU2303	0	0
vOTU2305	0	0
vOTU2306	0	0
vOTU2309	0	0
vOTU2310	0	0
vOTU2311	0	0
vOTU2312	0	0
vOTU2313	0	0
vOTU2314	0	0
vOTU2315	0	0
vOTU2317	0	0
vOTU2318	0	0
vOTU2319	0	0
vOTU2320	0	0
vOTU2322	0	0
vOTU2323	0	0
vOTU2324	0	0
vOTU2325	0	0
vOTU2326	0	0
vOTU2327	0	0
vOTU2328	0	0
vOTU2329	0	0
vOTU2330	0	0
vOTU2331	0	0
vOTU2332	0	0
vOTU2335	0	0
vOTU2337	0	0
vOTU2338	0	0
vOTU2339	0	0
vOTU2340	0	0
vOTU2341	0	0
vOTU2342	0	0
vOTU2343	0	0
vOTU2344	0	0
vOTU2345	0	0
vOTU2346	0	0
vOTU2347	0	0
vOTU2348	0	0
vOTU2349	0	0
vOTU2350	0	0
vOTU2351	0	0
vOTU2353	0	0
vOTU2354	0	0
vOTU2355	0	0
vOTU2356	0	0
vOTU2357	0	0
vOTU2358	0	0
vOTU2361	0	0
vOTU2362	0	0
vOTU2363	0	0
vOTU2364	0	0
vOTU2365	0	0
vOTU2366	0	0
vOTU2367	0	0
vOTU2368	0	0
vOTU2369	0	0
vOTU2370	0	0
vOTU2371	0	0
vOTU2372	0	0
vOTU2373	0	0
vOTU2374	0	0
vOTU2375	0	0
vOTU2376	0	0
[truncated: 10,299 more rows]
